# Supplementary material
Source: PubMed Central journal article supplement (PMC11500676)
Supplement: NIHMS2019150-supplement-Supplementary_Info.pdf [file NIHMS2019150-supplement-Supplementary_Info.pdf]

# Supplementary Information

## 1 Theoretical study of fluorescence imaging using targeted illumination and confocal gating

### 1.1 Theory

In this section we develop a theoretical model for fluorescence imaging with targeted illumination and confocal gating. We consider a generalized model of scanning microscopes for all imaging configurations, as shown in [Supplementary Fig. 1\(a\)](#). In this model, an excitation focus is scanned in 2D across the sample, with or without targeted illumination, and fluorescence is detected through an adjustable confocal gate. We assume the sample has a fluorophore distribution described by  $O(\vec{r})$ , and the excitation and detection PSFs are described by normalized circularly symmetric  $PSF_e(\vec{r})$  and  $PSF_d(\vec{r})$ , where  $\int PSF_{e,d}(\vec{\rho}, z) d\vec{\rho} = 1$ ,  $\vec{r} = (\vec{\rho}, z) = (x, y, z)$  is the 3D coordinate. During imaging, the excitation intensity distribution when the laser beam is scanned at location  $\vec{\rho}_0$  can be written as

$$\begin{aligned} I_e(\vec{r}_s, \vec{\rho}_0) &= M_T(\vec{\rho}_s) \delta(\vec{\rho}_s - \vec{\rho}_0) \otimes PSF_e(\vec{r}_s) \\ &= M_T(\vec{\rho}_0) PSF_e(\vec{r}_s - \vec{\rho}_0) \end{aligned} \quad (S1)$$

where  $M_T(\vec{\rho})$  is the 2D targeted illumination mask,  $\vec{r}_0$  and  $\vec{r}_s$  are spatial coordinates at the DMD and the sample plane, and  $\otimes$  represents a convolution. The generated fluorescence distribution in the sample is obtained by multiplying Eq. S1 by the sample fluorophore distribution, leading to

$$I_f(\vec{r}_s, \vec{\rho}_0) = I_e(\vec{r}_s, \vec{\rho}_0) \cdot O(\vec{r}_s) \quad (S2)$$

From here, we distinguish two different detection strategies to reflect differences in implementations of scanning microscopy, namely without and with fluorescence re-scanning<sup>1</sup>.

Most commonly laser scanning microscopy is implemented without re-scanning, where the fluorescence signal is detected by a single-pixel detector (for point scan) or a line camera (for line scan), and the image is formed by numerically assigning intensity readout values according to the scan location  $\vec{\rho}_0$ :

$$\begin{aligned} I_{nr}(\vec{\rho}_0) &= \int d\vec{\rho}_c A_d(\vec{\rho}_c - \vec{\rho}_0) [I_f(\vec{r}_c, \vec{\rho}_0) \otimes PSF_d(\vec{r}_c)] \\ &= \iint d\vec{\rho}_c d\vec{r}_s A_d(\vec{\rho}_c - \vec{\rho}_0) I_e(\vec{r}_s, \vec{\rho}_0) O(\vec{r}_s) PSF_d(\vec{r}_c - \vec{r}_s) \\ &= M_T(\vec{\rho}_0) [O(\vec{\rho}_0) \otimes [PSF_e(\vec{r}_0) \cdot [A_d(\vec{\rho}_0) \otimes PSF_d(\vec{r}_0)]]] \end{aligned} \quad (S3)$$

where  $A_d(\vec{\rho})$  represents the detection aperture ([Supplementary Table 1](#)),  $\vec{r}_c$  is the coordinate at an intermediate image space for confocal gating, and  $\vec{r}_d$  are the coordinates in the final detection space.

Alternatively, if re-scanning is implemented, a second set of scanners is used to optically assign fluorescent photons onto a 2D multi-pixel detector with pixel size assumed to be infinitely small<sup>1</sup>:

$$\begin{aligned} I_r(\vec{\rho}_c) &= \int d\vec{\rho}_0 [A_d(\vec{\rho}_c - \vec{\rho}_0) \cdot [I_f(\vec{r}_c, \vec{\rho}_0) \otimes PSF_d(\vec{r}_c)]] \\ &= \iint d\vec{\rho}_0 d\vec{r}_s A_d(\vec{\rho}_c - \vec{\rho}_0) I_e(\vec{r}_s, \vec{\rho}_0) O(\vec{r}_s) PSF_d(\vec{r}_c - \vec{r}_s) \\ &= \int d\vec{r}_s O(\vec{r}_s) PSF_d(\vec{r}_c - \vec{r}_s) \int d\vec{\rho}_0 A_d(\vec{\rho}_c - \vec{\rho}_0) M_T(\vec{\rho}_0) PSF_e(\vec{r}_s - \vec{\rho}_0) \end{aligned} \quad (S4)$$

**Supplementary Table 1.** Detection apertures for different imaging configurations.  $v_d$  is the radius of confocal pinhole or half-width of the confocal slit.

| Imaging configuration   | $A_d(\vec{\rho})$    |
|-------------------------|----------------------|
| Point scanning confocal | $ \vec{\rho}  < v_d$ |
| Line scanning confocal  | $ x  < v_d$          |
| Widefield               | 1                    |

632 Note that Eq. S4 can also be used for modeling a widefield microscope by setting the detection aperture  $A_d(\vec{\rho}) = 1$ . The models  
 633 for these different imaging configurations are summarized in [Supplementary Table 1](#).

634 Here Eq. S3, S4 can be generally applied to different imaging configurations with varying degrees of confocal gating  
 635 (by adjusting  $A_d(\vec{\rho})$ ), with/without targeted illumination (by adjusting  $M_T(\vec{\rho})$ ), and with/without image re-scan. Specifically,  
 636 for standard confocal or widefield imaging without targeted illumination, we have  $M_T(\vec{\rho}) = 1$  and therefore  $I_e(\vec{r}_s, \vec{\rho}_0) =$   
 637  $PSF_e(\vec{r}_s - \vec{\rho}_0)$ . Thus Eq. S3, S4 can be reduced to

$$I(\vec{r}) = O(\vec{r}) \otimes PSF_{tot}(\vec{r}) \quad (S5)$$

638 where  $PSF_{tot}(\vec{r}) = PSF_e(\vec{r}) \cdot [A_d(\vec{r}) \otimes PSF_d(\vec{r})]$  for confocal microscopy without re-scanning, and  $PSF_{tot}(\vec{r}) = PSF_d(\vec{r}) \cdot [A_d(\vec{r}) \otimes$   
 639  $PSF_e(\vec{r})]$  for confocal microscopy with re-scanning.

## 640 1.2 Simulation details

641 We next aim to develop a simulation model relevant to *in vivo* voltage imaging conditions. To simulate soma-targeted membrane  
 642 imaging [[Supplementary Fig. 1\(b\)](#)], we assume the fluorescence signal can be modeled as a spherical shell of radius  $r_{neuron} = 7.5$   
 643  $\mu\text{m}$ , thickness  $t_{neuron} = 4$  nm, and centered at  $\vec{r} = (0, 0, 0)$ :

$$O_s(\vec{r}) = \begin{cases} 1 & \text{if } r_{neuron} \leq |\vec{r}| \leq r_{neuron} + t_{neuron} \\ 0 & \text{elsewhere} \end{cases} \quad (S6)$$

644 In addition, we assume background is produced by a uniform fluorescent slab of finite axial span  $z \in [z_{min}, z_{max}]$  and normalized  
 645 fluorescence concentration  $c_0 \in [0, 1]$  outside the cell:

$$O_b(\vec{r}) = \begin{cases} 0 & \text{if } |\vec{r}| \leq r_{neuron} \\ c_0 & \text{if } |\vec{r}| > r_{neuron} \text{ and } z \in [z_{min}, z_{max}] \end{cases} \quad (S7)$$

646 We estimate the background fluorescence concentration  $c_0$  using anatomical data of the typical brain<sup>2,3</sup>. Specifically, we  
 647 assume a cell density of  $9.2e^4/\text{mm}^2$ , with each soma being a spherical shell of  $15 \mu\text{m}$  diameter and membrane thickness of  $4$   
 648 nm. With perfect soma targeting and membrane localization, the fractional ratio of soma membrane within a unit volume is  
 649  $1.1e^{-3}$ . Furthermore, the fraction of cells labeled with GEVI can be affected by viral delivery and genetic targeting, which we  
 650 assume to be  $\mu_N \in [0.01, 1]$ , leading to the normalized background fluorescence concentration  $c_0 = 1.1e^{-3} \cdot \mu_N$ . Bearing in  
 651 mind that if we allowed the thickness of the background volume to be semi-infinite widefield microscopy would have infinite  
 652 background and produce no contrast at all, we limited the background thickness to be  $t_{sample} = z_{max} - z_{min} = 1$  mm, with the  
 653 fluorescent object  $O_s(\vec{r})$  located in the range  $0 - 300 \mu\text{m}$  below the background volume surface  $z = z_{min}$ .

654 In the case of targeted illumination, typically a binary illumination mask is used that targets only in-focus objects. This  
 655 leads to a spatially varying illumination pattern, and thus a spatially varying degree of background rejection. Here we adopt a  
 656 simplified model to study the average effect of targeted illumination, where a gray-scale targeted illumination mask is defined as

$$M_T(\vec{\rho}) = \begin{cases} 1 & \text{if } |\vec{\rho}| \leq r_{neuron} \\ \mu_T & \text{elsewhere} \end{cases} \quad (S8)$$

657 where  $\mu_T \in [0, 1]$  is the average fill factor of the targeted illumination mask. In Eq. S8 and illustrated in [Supplementary Fig.](#)  
 658 [1\(c,d\)](#), the mask has unit transmittance within a central disk region corresponding to a targeted cell  $O_s(\vec{r})$  of interest, allowing  
 659 excitation light to fully reach the cell. Outside the cell, the mask has a reduced transmittance  $\mu_T$  equal to the ratio of ON pixels  
 660 to the total pixels of DMD (i.e., the fill factor), such that out-of-focus background from illumination targets other than  $O_s(\vec{r})$   
 661 can be captured. Note that  $M_T(\vec{\rho})$  can be further decomposed into a uniform mask  $M_{T0}(\vec{r}) = 1$  (no targeted illumination) and  
 662 targeted mask  $M_{T1}(|\vec{\rho}| \leq r_{neuron}) = 1$  (fully targeted illumination), where

$$M_T(\vec{r}) = \mu_T M_{T0}(\vec{r}) + (1 - \mu_T) M_{T1}(\vec{r}) \quad (S9)$$

663 This allows us to further decompose the final detected fluorescence image into one generated by the uniform mask  $M_{T0}(\vec{r})$   
 664 and targeted mask  $M_{T1}(\vec{r})$ :

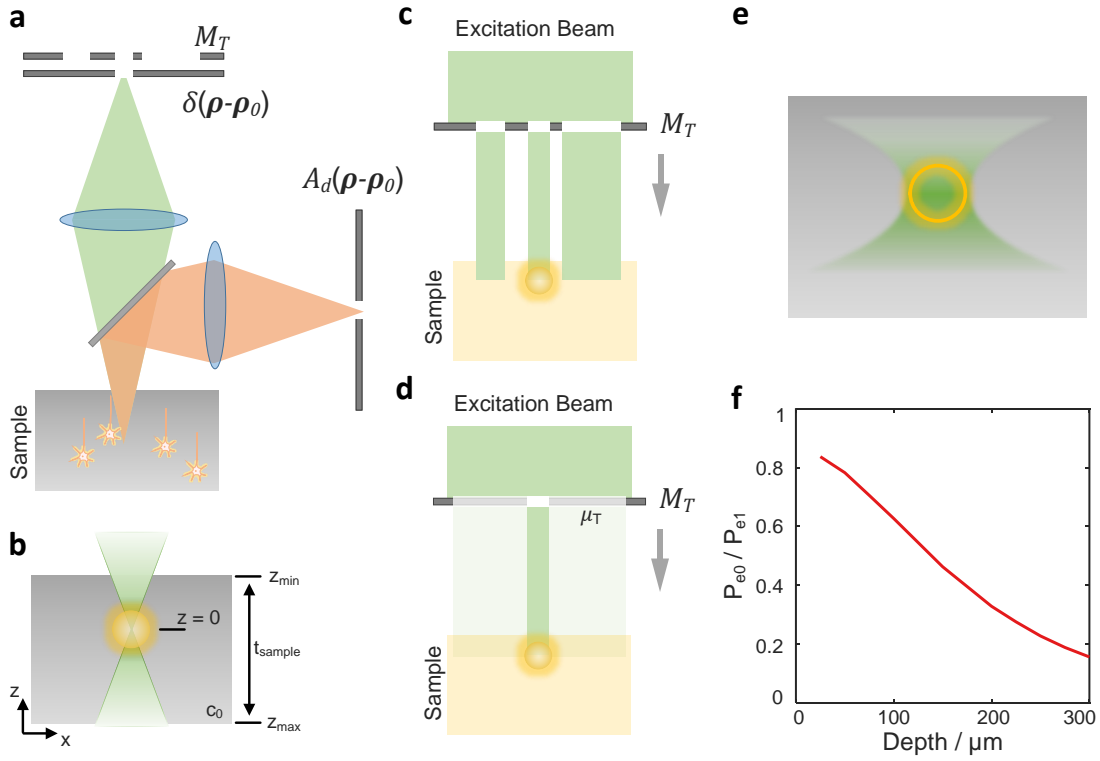

**Supplementary Fig. 1.** (a) Modeling for fluorescence imaging using targeted illumination and confocal gating. A targeted illumination mask  $M_T$  is overlaid on top of the excitation mask  $\delta(\vec{\rho} - \vec{\rho}_0)$  that controls the excitation pattern, with fluorescence signals spatially filtered by a detection aperture  $A_d$ .

(b) Imaging of fluorescence signal confined to cell membrane. Note that the fluorescent object is larger than the excitation focus.

(c) Patterning the excitation light using a binary targeted illumination mask.

(d) Patterning the excitation light using a grayscale targeted illumination mask. Central region of mask corresponding to the cell of interest has unit transmittance, with everywhere else having a transmittance equal to the average mask fill factor  $\mu_T$ .

(e) Illustration of reduced excitation power due to the use of targeted illumination. Because of tissue scattering and the finite depth-of-field of the microscope, the excitation power is reduced near the periphery of the cell. This is in contrast to non-targeted illumination where the entire cell receives the same amount of excitation power throughout.

(f) Reduction of excitation power under targeted illumination compared to non-targeted illumination at different imaging depths. Because scattering increases with depth, cells located deeper inside the tissue receive less excitation power.

$$I_s(\vec{r}) = \mu_T I_{s0}(\vec{r}) P_{e0} + (1 - \mu_T) I_{s1}(\vec{r}) P_{e1} \quad (\text{S10})$$

$$I_b(\vec{r}) = \mu_T I_{b0}(\vec{r}) P_{e0} + (1 - \mu_T) I_{b1}(\vec{r}) P_{e1} \quad (\text{S11})$$

665 where  $I_s(\vec{r})$  is the signal image generated by  $O_s(\vec{r})$ ,  $I_b(\vec{r})$  is the background image generated by  $O_b(\vec{r})$ , and the subscripts  $(*)_{0,1}$   
666 on  $I_{s,b}$  represent fluorescence images produced by the uniform and targeted masks respectively. Here we introduced a pair  
667 of new variables  $P_{e0,e1}$  as the excitation power under non-targeted or targeted illumination, such that different amounts of  
668 ballistic excitation power can be delivered into the sample. If  $P_{e0} = P_{e1}$ , the cell may receive less excitation power when the  
669 illumination is targeted [Supplementary Fig. 1(e,f)] due to a reduction of non-ballistic excitation. As a result, this can lead to  
670 perceived SNR differences, and manifested in our experiments as reduced photobleaching in the case of targeted illumination.  
671 By adjusting  $P_{e0,e1}$  such that the cell of interest receives the same amount of excitation power under both non-targeted and  
672 targeted illumination:

$$P_{e0} \int d\vec{r} O_s(\vec{r}) = P_{e1} \int d\vec{r} [[M_{T1}(\vec{\rho}) \otimes PSF_e(\vec{r})] \cdot O_s(\vec{r})] \quad (\text{S12})$$

673 we eliminate differences in photobleaching rate, allowing us to focus on the effects of fluorescence collection efficiency and  
674 background rejection on the final SNR.

675 For neuronal imaging, one is generally interested in the integrated signal within a predefined ROI (such as a soma). The  
676 ROI can be selected manually or with specialized algorithms. Here, with a knowledge of both signal and background, we  
677 always choose a circular ROI that maximizes the SNR in the final detected image  $I_s(\vec{r}) + I_b(\vec{r})$ :

$$SNR = |\alpha| F_s / \sqrt{F_s + F_b} \quad (\text{S13})$$

$$F_s = \eta \int_{ROI} d\vec{r} I_s(\vec{r}) \quad (\text{S14})$$

$$F_b = \eta \int_{ROI} d\vec{r} I_b(\vec{r}) \quad (\text{S15})$$

678 where  $\eta$  here is a scaling factor that converts recorded intensity into photon counts, and  $\alpha$  is the percentage change of  
679 fluorescence signal from baseline.

680 Similarly, we can also study the amount of crosstalk induced by background fluorescence, which we define from the  
681 baseline-signal-to-background ratio:

$$SBR = F_s / F_b \quad (\text{S16})$$

682 Here for voltage imaging we set  $\alpha = 10\%$ , and normalize the fluorescence signal with  $\eta$  such the total emitted fluorescence  
683 from the cell membrane is  $F_s = 10,000$ . Therefore the theoretical maximum SNR is 10 for a widefield microscope with 100%  
684 detection efficiency and no crosstalk from background fluorescence ( $SBR = +\infty$ ).

685 Finally, brain scattering plays an important part in *in vivo* imaging. Here we used NAOMi<sup>4</sup> to calculate the scattering-  
686 degraded PSFs for both excitation and detection at different depths inside the brain. This technique generates a simulated  
687 volume with refractive index variations based on actual anatomical data, including brain vasculature and random scatterers of  
688 varying size and strength. The 3D PSFs can then be obtained by numerically propagating the wavefront from the microscope  
689 back aperture through the simulated anatomical volume. We modified the original program to evaluate one-photon rather than  
690 two-photon PSFs, with all anatomical data kept as default. According to our experimental parameters, we approximated the  
691 excitation and detection wavelengths to both be  $\lambda = 0.6 \mu\text{m}$ , with excitation  $NA_e = 0.4$ , and detection  $NA_d = 0.8$ . The final  
692 scattering PSFs were averaged over 25 locations across the simulated volume. Tissue absorption was ignored.

### 693 1.3 Simulation results

694 In this section we aim to provide a general guide for the optimization of TICO microscopy for *in vivo* imaging, and study how  
695 varying degrees of confocal gating  $A_d(\vec{\rho})$  and targeted illumination  $\mu_T \in [0.01, 1]$  affect the imaging performance in terms of  
696 SNR and SBR. We account for different imaging conditions by allowing for adjustments in imaging depth  $z_{min}$  and labeling  
697 density  $\mu_N \in [0.01, 1]$  (affecting both scattering and background fluorescence). To be in accord with our actual implementation  
698 of TICO microscopy, we confine ourselves here only to the re-scanned imaging model described by Eq. S4.

#### 699 1.3.1 Effects of confocal gating on SNR

700 To maximize the SNR of a confocal microscope, the pinhole/slit size must be optimized to balance signal collection and  
701 background rejection<sup>1</sup>. In the case of a point-object model and in the absence of scattering<sup>5</sup>, the optimal size of a confocal  
702 pinhole is found to match or be slightly larger than the excitation focus (1-3 Airy units for a diffraction-limited system). This  
703 principle is generally followed in most confocal imaging systems. However, conditions for *in vivo* imaging differ significantly  
704 from an ideal point-object model in that: (1) signal arises from an extended object (cell membrane in our case) that can have an  
705 axial extent larger than the microscope depth-of-field; (2) tissue scattering leads to blurred PSFs such that the system is no  
706 longer diffraction limited. Both of these factors suggest that to collect more signal one must increase the confocal pinhole/slit  
707 size beyond its conventional setting. However such an increase also leads to more background, bringing the overall effect on  
708 SNR into question.

709 To address this question, we start by investigating the effects of confocal gating on the attainable SNR under our simulated  
710 imaging conditions with no targeted illumination ( $\mu_T = 1$ ) and a high labeling density  $\mu_N = 1$ . At each imaging depth, we  
711 calculate the SNR and SBR obtained from a cell of interest as a function of confocal pinhole/slit size  $2v_d$ . As with a standard

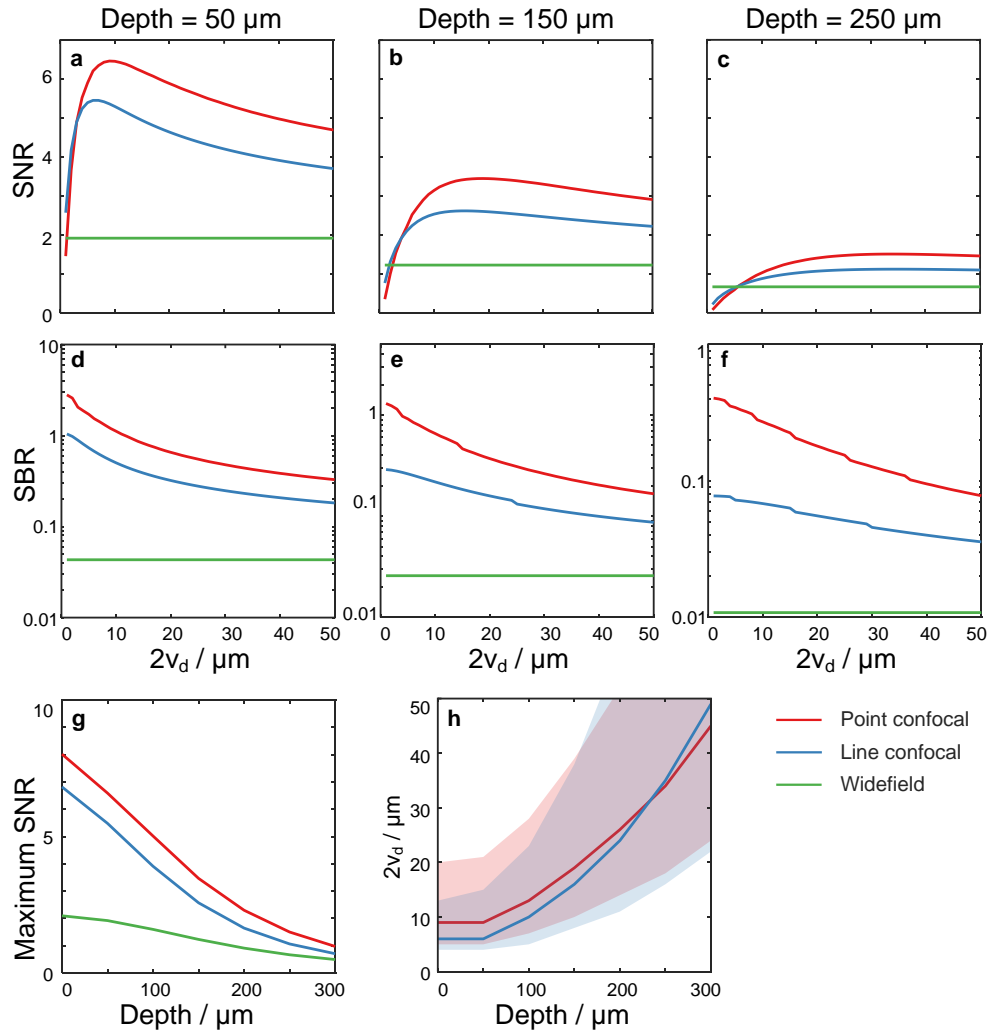

**Supplementary Fig. 2.** Effect of confocal gating strength on SNR. Simulation performed without targeted illumination ( $\mu_T = 1$ ) and with labeling density  $\mu_N = 1$ . (a-f) Imaging SNR (top row) and SBR (middle row) as a function of confocal pinhole/slit size  $2v_d$  at different imaging depths. (g) Maximum achievable SNR as a function of imaging depth across 3 imaging configurations with optimized confocal pinhole/slit size. (f) Solid line, pinhole/slit size  $2v_d$  to attain maximum SNR at varying depths. Shaded area, pinhole/slit size  $2v_d$  to attain at least 90% of the maximum SNR.

712 confocal microscope, an increase in pinhole/slit size leads to an increase in background fluorescence as reflected by a decrease  
 713 in SBR [Supplementary Fig. 2(d-f)]. In terms of SNR, there still exists an optimal pinhole/slit size, albeit much larger than for  
 714 the case of a point object: to achieve maximum SNR at 150  $\mu\text{m}$  depth, the optimal  $2v_d$  for point and line scan confocal are 19  
 715 and 16  $\mu\text{m}$  respectively, instead of 1 and 0.8  $\mu\text{m}$  in case of a point object embedded in a clear (non-scattering) medium. As the  
 716 imaging depth increases, the confocal pinhole/slit must be opened further to accommodate the PSF blurring caused by tissue  
 717 scattering [Supplementary Fig. 2(h)], while the maximum achievable SNR decreases [Supplementary Fig. 2(g)]. Note that at  
 718 larger imaging depths, the SNR becomes only weakly dependent on  $v_d$  once it reaches the shoulder in the curve, as shown in  
 719 the shaded areas of Supplementary Fig. 2(h) that represent all  $2v_d$  values that attain 90% of the maximum SNR. That is, slightly  
 720 smaller  $v_d$  values can be used to reduce crosstalk with only minimal penalty on SNR.

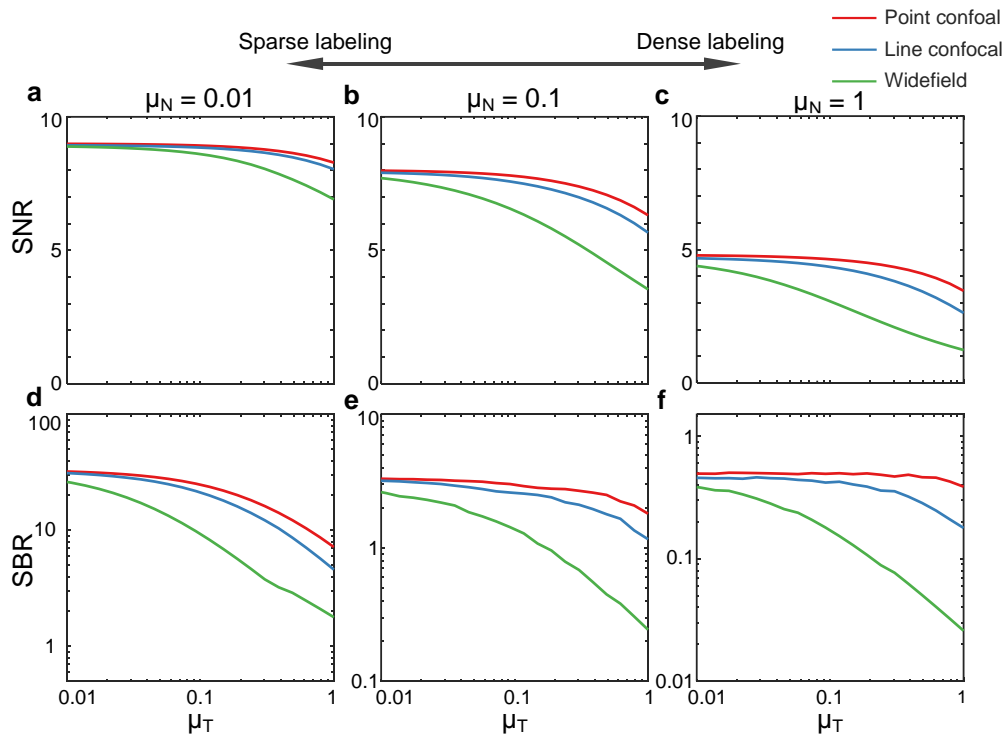

**Supplementary Fig. 3.** Comparison of theoretical SNR and SBR for *in vivo* voltage imaging with targeted illumination and confocal gating.

(a-c) Maximum SNR as a function of targeted illumination mask fill factor  $\mu_T$  at 150  $\mu\text{m}$  imaging depth with different sample labeling densities  $\mu_N$ .

(d-f) Theoretical SBR under the same conditions in (a-c) when maximum SNR is achieved.

### 721 1.3.2 Optimal SNR and SBR with both confocal gating and targeted illumination

722 Having established an approach to optimize the system SNR, we next seek to understand how the combination of targeted  
 723 illumination and confocal gating influence SNR and crosstalk. Here for all imaging conditions, the confocal pinhole/slit size  
 724 is optimized to achieve the maximum SNR. [Supplementary Fig. 3\(a-c\)](#) show the maximum SNR for the three considered  
 725 imaging systems at 150  $\mu\text{m}$  imaging depths with various tissue labeling densities and targeted illumination mask fill factors. In  
 726 general, increasing imaging depth and labeling density all lead to reduced SNR, which can be alleviated with the application  
 727 of either confocal gating or targeted illumination. While both techniques are effective in improving SNR, we found that the  
 728 combined strategy shows marginal SNR improvements compared to fully targeted illumination if the excitation targets are  
 729 sparsely distributed ( $\mu_T = 0.01$ ). However, if the targeted illumination mask fill factor is increased to address a larger number  
 730 of neurons, the addition of confocal gating provides a larger SNR benefit. In fact, with confocal gating, the SNR becomes  
 731 almost invariant and close to optimal for targeted illumination masks with a moderate excitation density  $\mu_T \leq 0.1$ .

732 Another important consideration when evaluating single-photon imaging techniques is the crosstalk that arises from  
 733 background fluorescence, as characterized by SBR. At optimal SNR, SBR follows a similar trend where confocal gating is  
 734 most beneficial when the excitation targets are densely distributed, but less so when the labeling density or targeting density is  
 735 low [[Supplementary Fig. 3\(d-f\)](#)]. However, with a small penalty on SNR, stronger background rejection can be achieved by  
 736 using smaller confocal pinhole/slit sizes, which would lead to more significant SBR advantages even in case of sparse targeted  
 737 illumination masks ( $\mu_T = 0.01$ ).

## 738 2 Characterization of TICO microscopy for *in vivo* voltage imaging

### 739 2.1 TICO microscopy improves image contrast

740 We begin by evaluating the respective benefits of targeted illumination and confocal gating on background reduction. These  
 741 benefits are quantified most simply by their effect on the apparent image contrast as characterized by the SBR associated  
 742 with cell bodies. We found that when performing *in vivo* imaging of Voltron2-expressing neurons at high labeling densities,

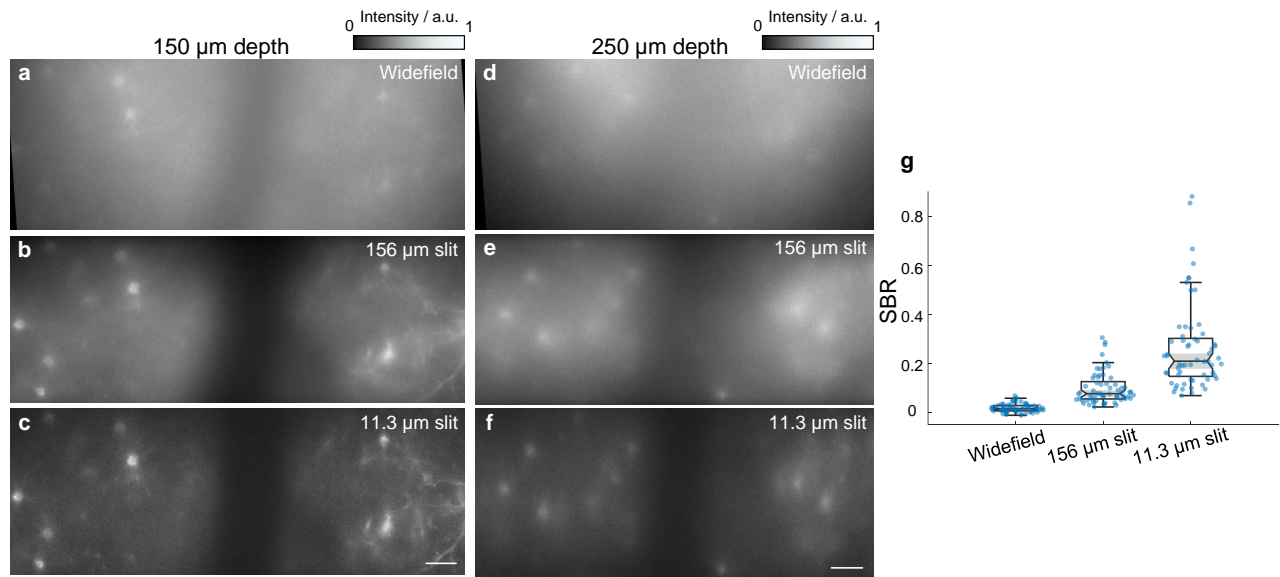

**Supplementary Fig. 4. Comparison of spatial image contrast under a standard widefield microscope and TICO microscope.**

- (a) Voltron2 fluorescence image acquired with a standard widefield microscope using a LED for excitation and a sCMOS camera for detection.
- (b) Voltron2 fluorescence image over the same FOV as (a), but acquired with TICO microscopy without targeted illumination and with a confocal slit size of 156 μm.
- (c) Same as (b) but with a slit size of 11.3 μm. Scale bar 50 μm. a.u., arbitrary unit.
- (d-f) Same as (a-c) but at an imaging depth of 250 μm.
- (g) Comparison of SBR of neuronal somas under different microscope configurations.  $n = 61$  cells over 5 FOVs at depths in the range 130 - 250 μm. The median/Q1-Q3 for widefield, 156 μm confocal slit and 11.3 μm confocal slit are 0.0151/0.0066-0.0283, 0.0768/0.0553-0.1259, and 0.2093/0.1474-0.3022. Box plot the same as in Fig. 2(e).

743 individual neurons were barely distinguishable from background when using conventional widefield microscopy, even in  
 744 regions where they were sparsely distributed [Supplementary Fig. 4(a,d); median SBR 0.0151 for  $n = 61$  neurons over 5 FOVs].  
 745 When confocal imaging was applied over the same FOVs, even a large slit size improved SBR considerably. We found that slit  
 746 sizes of 156 μm and 11.3 μm (projected into sample) led to increases in SBR of 5.1× and 13.9× respectively (Supplementary  
 747 Fig. 4). This gain was further amplified 3.6× with the addition of targeted illumination [Supplementary Fig. 5(a-d,i);  $n = 52$   
 748 cells from 1 FOV, 14 μm confocal slit width], leading to overall improvements in SBR of ~ 18× and ~ 50×, compared to  
 749 conventional widefield microscopy. We note that this SBR improvement is likely an underestimate, since we were unable to  
 750 identify individual neurons and locate the same FOV in more densely distributed regions with widefield microscopy, while we  
 751 could routinely image these with TICO microscopy.

752 **2.2 TICO microscopy reduces crosstalk**

753 While the SBR characterizes the spatial image contrast, more important for voltage imaging is the temporal fluorescence signal  
 754 associated with individual neurons. A key requirement here for high-fidelity recording is that crosstalk between neurons be  
 755 kept to a minimum. Two sources of crosstalk are: 1) fluorescence spread from nearby neurons due to tissue scattering, and 2)  
 756 fluorescence from out-of-focus neurons, both of which lead to signal contamination. The observed reduction in background  
 757 that comes from both targeted illumination and confocal gating is reflected in the increase in the temporal contrast  $\Delta F / F$   
 758 of individual spikes [2(e,f)], from which we expect a commensurate reduction in crosstalk. Here we evaluate the two sources  
 759 separately in detail.

760 To quantify the spread of fluorescence from a neuron due to tissue scattering, we evaluated the decay of the measured spike  
 761 amplitude as a function of distance from the neuron. Specifically, we measured  $\Delta F_r / \Delta F_0$ , where  $\Delta F_0$  is the spike amplitude at  
 762 the neuron location, and  $\Delta F_r$  is the spike amplitude away from the neuron, averaged over annular ROIs of increasing radius. In  
 763 the absence of scattering where there is no spread of fluorescence  $\Delta F_r / \Delta F_0$  is expected to rapidly decay to zero away from  
 764 the neuron membrane (assuming no signal from proximal dendrites). With the application of confocal gating to a targeted

- 160  $\mu\text{m}$  depth

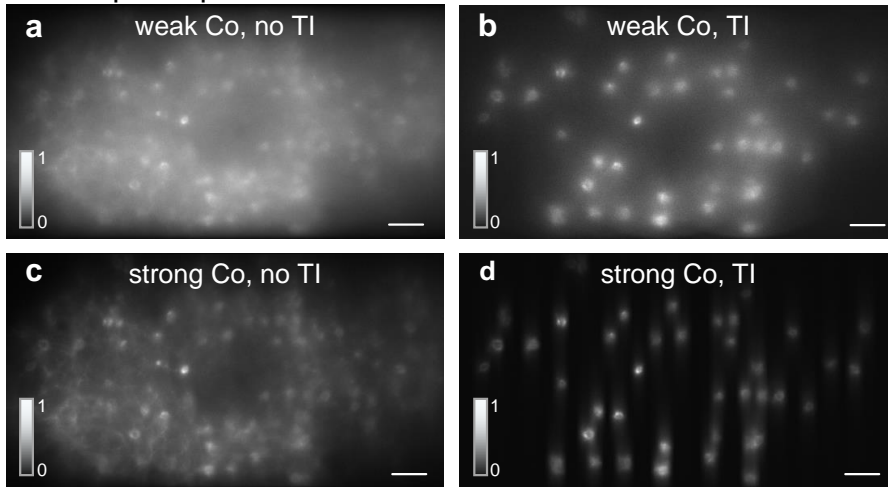

- 300  $\mu\text{m}$  depth

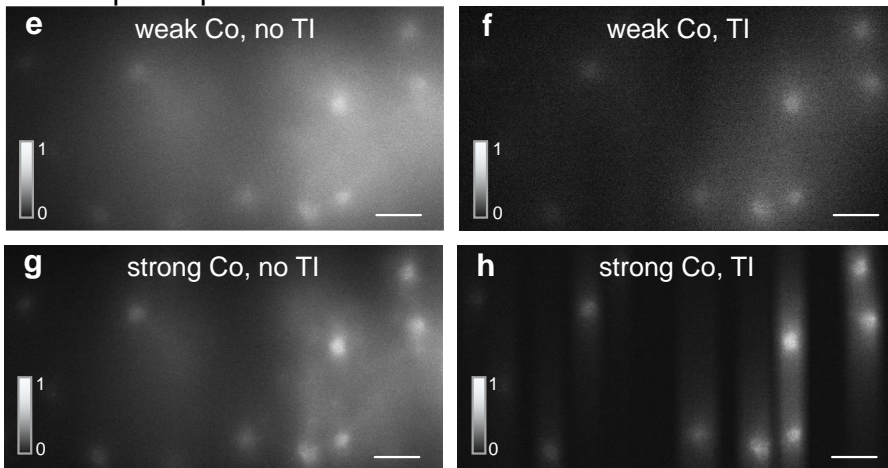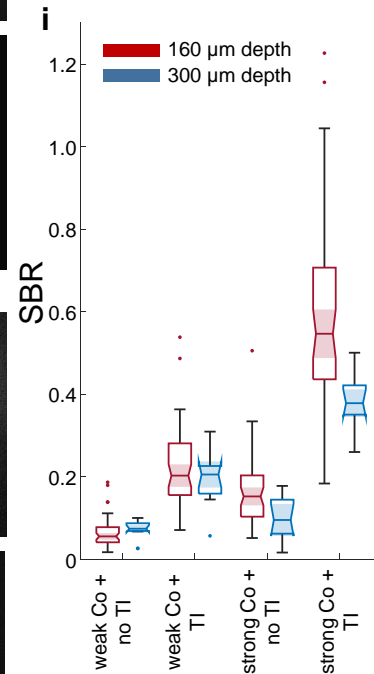

**Supplementary Fig. 5. Comparison of imaging contrast at different depths.**

(a-d) Voltron2 fluorescence imaged using TICO microscope under various combinations of weak/strong confocal detection (Co) and with/without targeted illumination (TI). Weak and strong confocal detection was achieved using a 156  $\mu\text{m}$  and 14  $\mu\text{m}$  confocal slit width respectively. Imaging depth at 160  $\mu\text{m}$ . Scale bars are 50  $\mu\text{m}$ . Colorbars represent intensity (arbitrary unit).

(e-h) Same as (a-d) but imaged at depth 300  $\mu\text{m}$ , with a strong confocal slit width set to 23  $\mu\text{m}$ .

(i) Comparison of estimated SBR for different imaging depths and microscope configurations. For 160  $\mu\text{m}$  depth,  $n = 52$  cells; for 300  $\mu\text{m}$  depth,  $n = 11$  cells. Box plot the same as in Fig. 2(e) except that dots represent outliers. Scale bars in (a-h) are 50  $\mu\text{m}$ .

illumination microscope, we found that stronger confocal gating (smaller slit width) led to weaker  $\Delta F_r/\Delta F_0$  across all measured distances up to 23.6  $\mu\text{m}$ , with the drop being most significant just beyond the neuron membrane [Supplementary Fig. 6(a), Supplementary Table S4]. At larger distances, the differences in  $\Delta F_r/\Delta F_0$  for different confocal slit sizes became smaller and less significant, particularly for smaller slit sizes of 4.5 and 11.3  $\mu\text{m}$  ( $p > 0.05$  for distance  $\geq 14.2$   $\mu\text{m}$ , Supplementary Table S4). Similarly, significant reductions in  $\Delta F_r/\Delta F_0$  were also observed within 23.6  $\mu\text{m}$  distances when targeted illumination was applied to a confocal microscope [Supplementary Fig. 6(c)]. We therefore conclude that TICO microscopy is effective at reducing crosstalk from scattered fluorescence even in cases where the labeling is confined to a single layer (i.e. even in cases where there is no out-of-focus fluorescence), thus improving the fidelity of voltage imaging at high labeling density.

To quantify the added advantage of TICO microscopy in reducing out-of-focus background, we analyzed the correlations between the subthreshold membrane voltage ( $V_m$ ) of neuron pairs throughout the imaging FOV. Neuronal populations tend



- Variable confocal slit width

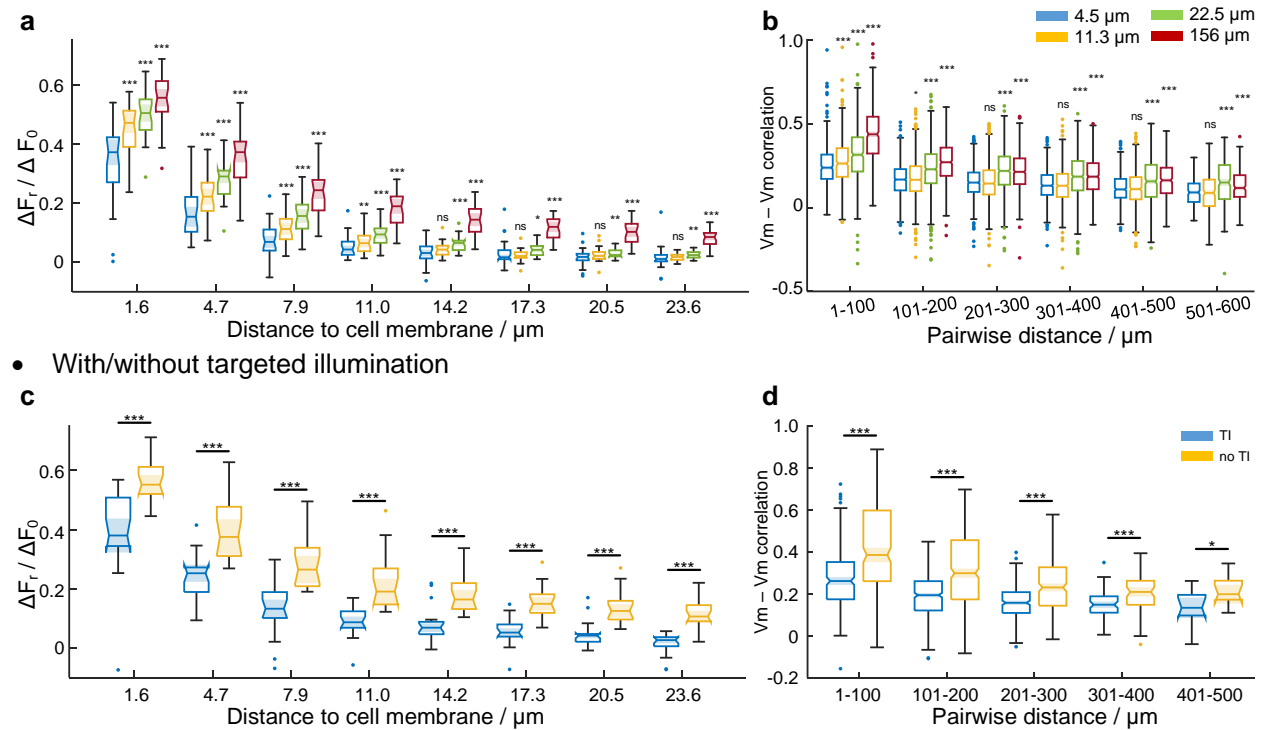

**Supplementary Fig. 6. Quantification of optical crosstalk under different microscope configurations.**

(a) Comparison of spike amplitude decay outside of cell membrane on a targeted illumination microscope with different confocal slit widths of 4.5, 11.3, 22.5, and 156  $\mu\text{m}$ .  $n = 30$  cells from 6 FOVs, 2 mice. Within each binned distance, "ns" not significant  $p \geq 0.05$ ,  $*p < 0.05$ ,  $**p < 0.01$ ,  $***p < 0.001$ , two-sided Wilcoxon signed-rank test compared to the control group of slit width 4.5  $\mu\text{m}$ , see [Supplementary Table S4](#) for statistics. Box plot the same as in Fig. 2(e).

(b) Subthreshold Vm correlations between neuron pairs of varying separation. Boxplot same as (a) except that dots represent outliers. Within each binned distance, "ns" not significant,  $***p < 0.001$ , two-sided Wilcoxon signed-rank test compared to the control group of slit width 4.5  $\mu\text{m}$ , see [Supplementary Table S4](#) for statistics.

(c,d) Same as (a,b) but comparing between with and without targeted illumination on a confocal microscope with 14  $\mu\text{m}$  wide slit. Two-sided Wilcoxon signed-rank test,  $n = 19$  cells from 5 FOVs, 2 mice.

775 to exhibit natural Vm correlations that are biological in origin; however, out-of-focus background can introduce additional  
 776 apparent correlations that are erroneous. In principle, the ground truth associated with biological correlations could be obtained  
 777 by pairwise electrophysiology, but such measurements are extremely difficult to perform, particularly in vivo, making it  
 778 impossible to obtain sufficient statistics for generalizable results. We therefore adopted an indirect assessment of crosstalk,  
 779 noting that biological Vm-Vm correlations should not depend on the imaging configuration (e.g. slit width, with/without  
 780 targeted illumination, etc.), and that any observed configuration-induced changes in the measured Vm-Vm correlations must  
 781 be the result of changes in crosstalk. We found that Vm-Vm correlations decreased significantly both when we decreased  
 782 confocal slit size and when we applied targeted illumination [[Supplementary Fig. 6\(b,d\)](#), [Supplementary Table S4](#)]. In addition,  
 783 we observed similar Vm-Vm correlations beyond a pairwise distance of 200  $\mu\text{m}$  when using smaller slits of 4.5 and 11.3  $\mu\text{m}$   
 784 but not with the larger 22.5 and 156  $\mu\text{m}$  slits sizes [[Supplementary Fig. 6\(b\)](#), [Supplementary Table S4](#)]. This indicates that  
 785 moderate confocal gating (slit size  $\sim 10$   $\mu\text{m}$ ) is effective at rejecting far-out-of-focus fluorescence that contributes to spurious  
 786 long-range correlations, but that stronger confocal gating is required if one wishes to remove near-out-of-focus fluorescence  
 787 over short distances.

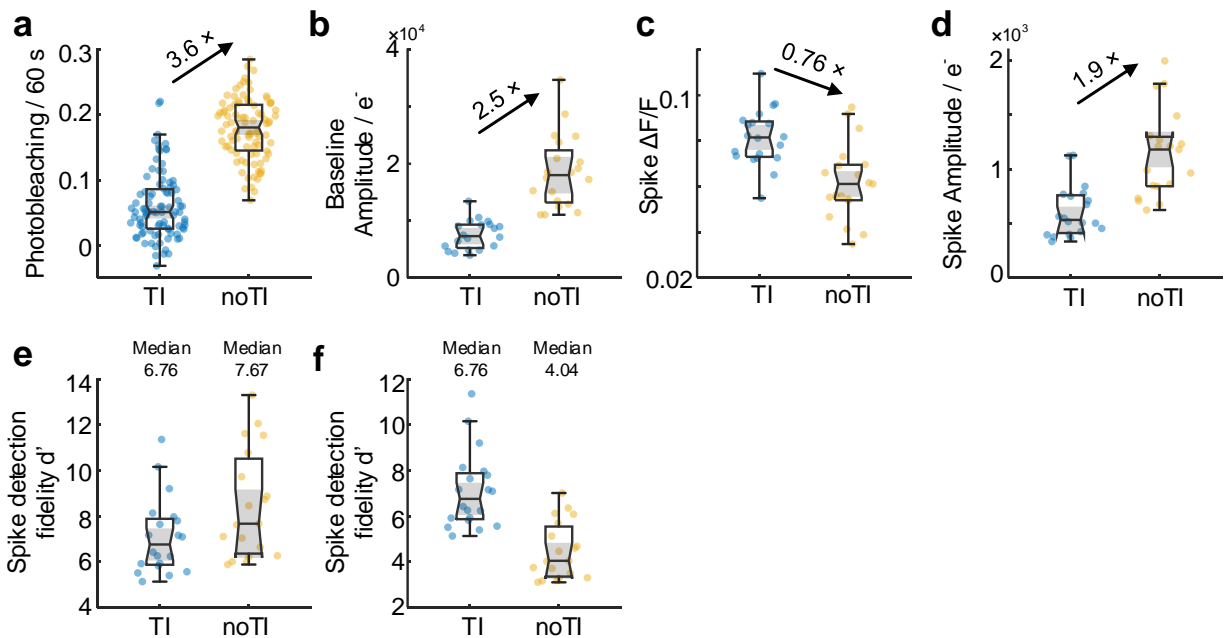

### Supplementary Fig. 7. Comparison of TICO microscope imaging performance with and without targeted illumination.

(a-d) Comparison of photobleaching rate, baseline fluorescence amplitude, spike contrast  $\Delta F/F$ , and spike amplitude measured with and without targeted illumination (TI, noTI) with a 14  $\mu\text{m}$  confocal slit. Same as main Fig. 2.

(e) Evaluation of theoretical shot-noise limited spike detection efficiency  $d'$  according to the measured spike contrast  $\Delta F/F$ , and spike amplitude.

(f) Theoretical evaluation of spike detection efficiency  $d'$  assuming equal photobleaching rate with and without targeted illumination. According to the measured reduction in photobleaching rate, the number of photoelectrons was reduced by 71.4% when without targeted illumination.

For panel (a),  $n = 92$  cells from 5 FOVs, 2 mice. For panel (b-f),  $n = 20$  cells from 5 FOVs, 2 mice. All box plots same as Fig. 2(e).

### 2.3 TICO microscopy improves spike SNR and reduces photobleaching

Equally important for *in vivo* voltage imaging are SNR and photobleaching rates. These two parameters are interdependent and fundamentally different measures of microscope performance than SBR or  $\Delta F/F$ . The effects of targeted illumination and confocal gating are discussed below.

We begin by comparing spike SNR from the same neurons imaged under targeted illumination but with different confocal slit widths of 4.5, 11.3, 22.5, and 156  $\mu\text{m}$  [6 FOVs from 2 mice]. As expected, increasing slit width allowed more signal to be captured thus leading to an increase in spike amplitude, but a net decrease in spike  $\Delta F/F$  [Fig. 2(e)] owing to the more pronounced increase in background fluorescence. The overall balance of these trends determines the degree to which spikes can be distinguished from background noise. By evaluating the shot-noise-limited spike detection fidelity  $d'$ , we found this to be optimized near the intermediate slit width of 22.5  $\mu\text{m}$  [Fig. 2(h)]. However, due to additional noise contributions inevitable to *in vivo* imaging such as detection electronics, brain motion, hemodynamics, etc., we found smaller and less significant differences in the experimentally measured spike SNR for slit widths in the range 11.3 to 156  $\mu\text{m}$  [Fig. 2(i), Supplementary Table S4]. A significant reduction in spike SNR was observed only for the smallest 4.5  $\mu\text{m}$  slit width, suggesting that shot noise was dominant only in this case, because of the small signal amplitude. These results are in qualitative agreement with the conclusions drawn from our theoretical modeling indicating that while achieving maximum SNR requires optimization of confocal gating strength, under *in vivo* imaging conditions this maximum is only weakly peaked and tolerant to a relatively wide range of slit widths (Supplementary Fig. 2).

Interestingly, when applying targeted illumination to a confocal microscope (14  $\mu\text{m}$  slit), we observed a small reduction in

806 SNR from 5.66 to 5.13 [Fig. 2(j)] despite the lowered background shot noise, which is in contrast to the case for a widefield  
807 microscope where the application of targeted illumination led to higher SNR<sup>7</sup>. The main reason for the perceived SNR difference  
808 here was the reduction in excitation power delivered under targeted illumination. To explain in detail, neurons in scattering  
809 tissue can be excited directly by unscattered (ballistic) photons or indirectly by scattered photons. When the illumination  
810 is targeted to the neurons, the former remains unchanged whereas the latter can decrease significantly. This was observed  
811 experimentally from the reduction in photobleaching rate by 71.4% for neurons with targeted illumination compared to without  
812 [Supplementary Fig. 7(a)], and also confirmed theoretically [Supplementary Fig. 1(f)]. However, the SNR advantage of  
813 targeted illumination still remains. Because confocal gating preferentially detects signals produced by ballistic excitation, we  
814 observed a smaller reduction in baseline fluorescence of 60% [Supplementary Fig. 7(b)]. Together with the 31.6% increase in  
815 spike contrast  $\Delta F/F$  resulting from the stronger background rejection capacity [Supplementary Fig. 7(c)], the overall decrease  
816 in spike amplitude under targeted illumination was only 47.4% [Supplementary Fig. 7(d)], much less than the decrease in  
817 photobleaching rate. In fact, a theoretical evaluation of the configurations where targeted illumination is applied to a confocal  
818 versus a widefield microscope under the condition of equal photobleaching rate confirms that TICO microscopy provides  
819 higher spike detection fidelity [Supplementary Fig. 7(e,f)], in accordance with the prediction from our simulation results  
820 (Supplementary Fig. 3). We thus conclude that the experimentally observed reduction in SNR with targeted illumination was  
821 dominantly caused by the resulting reduction in scattered excitation power, though mitigated by the improved signal detection  
822 efficiency and background rejection provided by confocal gating. The reduced excitation power in turn led to a much lower  
823 photobleaching rate, providing a capacity for longer duration imaging.

### 824 3 Evaluation of losses if the fluorescence were de-scanned through the DMD

825 A DMD chip consists of millions of micromirrors arranged in a 2D array, where each micromirror has two discrete tilt  
826 angles denoted by "On" and "Off". This periodic structure makes the DMD chip behave like a diffraction grating, where  
827 the incident light is diffracted into multiple diffraction orders with diffraction angle  $\beta$  determined by the grating equation  
828  $p(\sin \alpha + \cos \beta) = m\lambda$ , where  $\alpha$  is the incident angle,  $p$  is the grating pitch,  $\lambda$  is the wavelength, and  $m = \dots, -1, 0, 1, \dots$  is the  
829 diffraction order [Inset of Supplementary Fig. 8(a)]. On the other hand, the angle of specular reflection, determined by the  
830 blaze angle  $\theta_B$ , is defined as  $\beta' = -\alpha + 2\theta_B$ . According to the blaze-angle condition, the highest diffraction efficiency can  
831 only be achieved when  $\beta = \beta_B$  for a particular order. For fluorescence signals of large bandwidth, only certain wavelengths  
832 satisfy this blaze-angle condition. For other wavelengths, multiple diffraction orders must be collected in order to maximize  
833 transmission efficiency.

834 We consider a detection path of a fluorescence microscope where the fluorescent sample is imaged onto the DMD array  
835 surface and further re-imaged onto the camera. The detection aperture after the DMD [aperture A2 in Supplementary Fig. 8(a)]  
836 determines the fluorescence collection efficiency, which is determined here by the mirror size of the galvanometer. Clearly, a  
837 larger-sized mirror would increase collection efficiency, but would also in turn introduce more inertia resulting in lower scan  
838 speed/angle. To ensure maximum frame rate and FOV, the mirror size should be matched to the back aperture size of the  
839 objective [aperture A1 in Supplementary Fig. 8(a)]. As a result, except for certain diffraction orders at discrete wavelengths,  
840 the diffracted fluorescence suffers loss due to clipping by A2.

841 To further illustrate the effects of de-scanning through a DMD, we simulate the diffraction caused by the DMD and calculate  
842 the system transmission efficiency if the fluorescence signal were de-scanned through the DMD [Supplementary Fig. 8(a)]. The  
843 DMD used in our system has a mirror pitch  $p = 13.68 \mu\text{m}$  and tilt angle  $\theta_B = \pm 12^\circ$ . Based on our experimental setup, the  
844 focal length of each lens is  $f_1 = 12.5 \text{ mm}$ ,  $f_2 = 180 \text{ mm}$ ,  $f_3 = 37.5 \text{ mm}$ , with the diameter of the objective aperture A1 = 20  
845 mm, detection aperture A2 = 5 mm, and the NA of lens  $f_1$  is 0.8. We use Fresnel propagation to compute the electric field  
846 distribution of a point fluorescent object when imaged onto the DMD, which is multiplied by the phase profile introduced  
847 by the DMD with all pixels assumed to be in "On" state, and then Fourier transformed by another lens onto the detection  
848 aperture A2. For more accurate results, we additionally include the finite DMD fill factor (92%), which leads to a dependence  
849 of the diffraction patterns on the fluorescent source location [Supplementary Fig. 8(b-g)]. The ratio of the intensity within the  
850 detection aperture A2 to the total intensity at the A2 plane is used to determine the transmission efficiency (note that this does  
851 not include the finite fill factor of the DMD).

852 We calculate the DMD transmission efficiency over two spectral bands: 573 - 616 nm for Voltron imaging and 657 - 751  
853 nm for somArchon imaging. The transmission efficiency is averaged across the wavelength bands (assuming flat spectra), and  
854 all possible source locations. Overall, the transmission efficiency would be 74% for Voltron imaging, and 63% for somArchon  
855 imaging. Accounting for additional losses due to the finite DMD fill factor (92%), DMD window transmission efficiency  
856 (96% double pass), and mirror reflectivity (89%)<sup>8</sup>, the overall best transmission efficiencies if the fluorescence signals were  
857 descanned through the DMD would be 58% for Voltron, and 49% for somArchon.

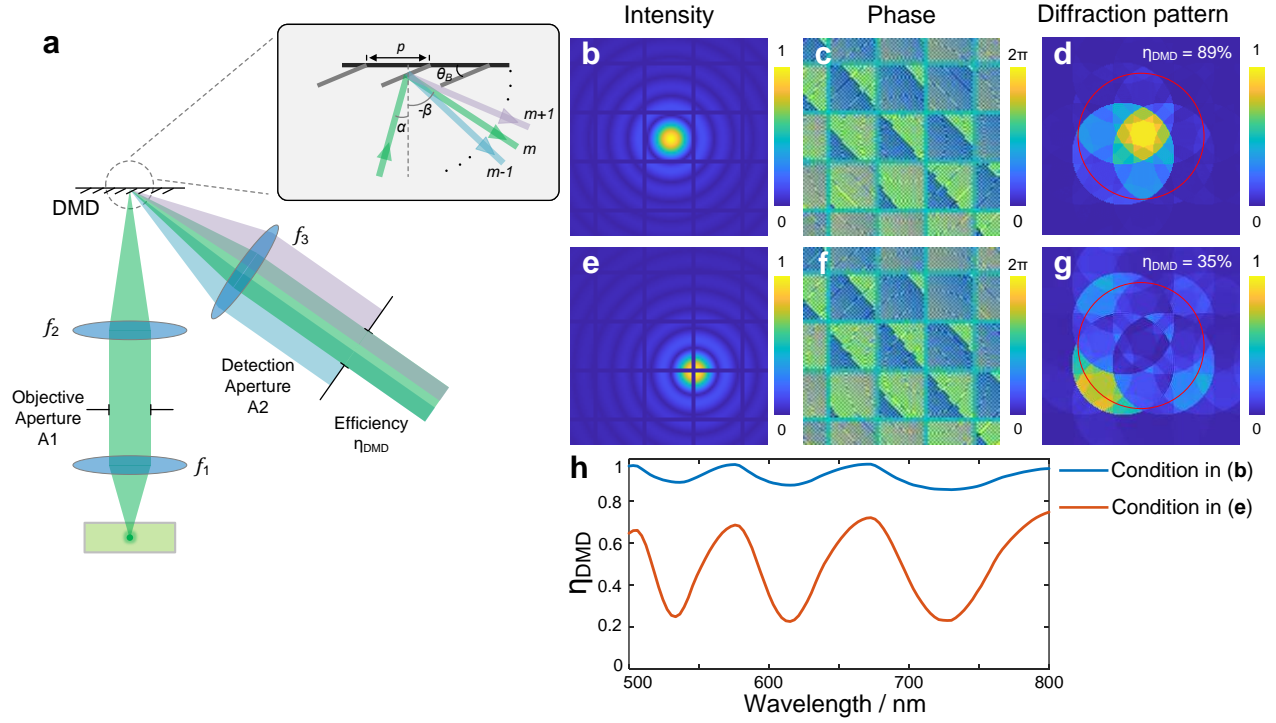

**Supplementary Fig. 8. Modeling of diffraction effect for fluorescence descanning through a DMD.**

(a) Schematic illustration of fluorescence descanning through a DMD.

(b, c) Intensity and phase profile when a fluorescent point source is imaged onto the DMD, the wavelength is assumed to be 600 nm.

(d) Corresponding far-field diffraction pattern at the detection aperture (red circle). The transmission efficiency through the detection aperture is 89%.

(e-g) Same as (b-d) but the fluorescent source is imaged to a different location of the DMD as shown in (e). The transmission efficiency now becomes 35%.

(h) Transmission efficiency  $\eta_{DMD}$  as a function of wavelength for the two fluorescent source locations shown in (b,e).

#### 4 Derivation of the spike detection fidelity obtained with a scanning microscope

To calculate the theoretical shot-noise-limited spike detection fidelity  $d'$ , we follow the procedure outlined in Ref.<sup>6</sup>. In detail, we assume a fluorescence signal model given by

$$F(t \geq 0) = F_0 + F_{AP} \cdot e^{-(t-t_0)/\tau} \quad (\text{S17})$$

where  $F_0$  is the baseline fluorescence,  $F_{AP}$  is the spike amplitude,  $\tau$  is the decay constant of the fluorescent indicator,  $t_0 \in [-1/v, 0]$  is the onset time of the spike event, and  $v$  is the sampling rate of the imaging system. In our case, as in the case for most voltage imaging microscopes, because the sampling interval is comparable to the fluorescence decay time, we assume a single time point at  $t = 0$  is used to detect spike events. For a scanning microscope, the excitation intensity is inversely proportional to the integration time  $1/\phi v$ . With an infinitely small integration time  $\phi \rightarrow 0$  (a scanning microscope), the detected fluorescence signal and background at time  $t = 0$  can be written as, respectively:

$$S_0 = \lim_{\phi \rightarrow 0} \frac{1}{\phi v} \int_0^\phi F(t) dt = \frac{F_0}{v} + \frac{F_{AP}}{v} \cdot e^{t_0/\tau} \quad (\text{S18})$$

and

$$B_0 = \lim_{\varphi \rightarrow 0} \frac{1}{\varphi v} \int_0^\varphi F_0 dt = F_0/v \quad (\text{S19})$$

868 Therefore, making use of Poisson statistics, the probabilities associated with obtaining a single measurement of photon  
869 number  $N$  without a spike event  $H^{(0)}$  and with a spike event  $H^{(1)}$  can be written as:

$$p(N|H^{(0)}) = B_0^N e^{-B_0} / N! \quad (\text{S20})$$

$$p(N|H^{(1)}) = S_0^N e^{-S_0} / N! \quad (\text{S21})$$

870 leading to a log-likelihood ratio

$$L(N) = \log \frac{p(N|H^{(1)})}{p(N|H^{(0)})} = N \log \frac{S_0}{B_0} - S_0 + B_0 \quad (\text{S22})$$

871 With the assumption that  $\frac{F_{AP}}{F_0} \ll 1$ , we can calculate the mean  $\mu_L^{(1,0)}$  and variance  $\sigma_L^{(1,0)}$  of  $L(N)$  under the assumptions of a  
872 spike occurring or not:

$$\mu_L^{(0)} = \frac{F_0}{v} \log\left(1 + \frac{F_{AP}}{F_0} e^{t_0/\tau}\right) - \frac{F_{AP}}{v} \cdot e^{t_0/\tau} \approx -\frac{F_{AP}^2}{2F_0 v} e^{2t_0/\tau} \quad (\text{S23})$$

$$\mu_L^{(1)} = \frac{1}{v} (F_0 + F_{AP} \cdot e^{t_0/\tau}) \log\left(1 + \frac{F_{AP}}{F_0} e^{t_0/\tau}\right) - \frac{F_{AP}}{v} \cdot e^{t_0/\tau} \approx \frac{F_{AP}^2}{2F_0 v} e^{2t_0/\tau} \quad (\text{S24})$$

$$(\sigma_L^{(0)})^2 = \frac{F_0}{v} \log^2\left(1 + \frac{F_{AP}}{F_0} e^{t_0/\tau}\right) \approx \frac{F_{AP}^2}{F_0 v} e^{2t_0/\tau} \quad (\text{S25})$$

$$(\sigma_L^{(1)})^2 = \frac{1}{v} (F_0 + F_{AP} \cdot e^{t_0/\tau}) \log^2\left(1 + \frac{F_{AP}}{F_0} e^{t_0/\tau}\right) \approx \frac{F_{AP}^2}{F_0 v} e^{2t_0/\tau} \quad (\text{S26})$$

873 Following the same definition of spike detection fidelity index<sup>6</sup>  $d' = (\mu_L^{(1)} - \mu_L^{(0)})/\sigma_L^{(0)}$ , we have  $d'(t_0) = \sqrt{\frac{F_{AP}^2}{F_0 v} e^{2t_0/\tau}}$ . If  
874 the spike onset time  $t_0$  is distributed uniformly over  $[-1/v, 0]$ , the averaged  $d'$  is found to be:

$$\bar{d}' = v \int_{-1/v}^0 d'(t_0) dt_0 = \tau v (1 - e^{-1/\tau v}) \frac{F_{AP}}{\sqrt{F_0 v}} \quad (\text{S27})$$

875  $F_{AP}$  can be obtained from the experimentally measured average  $\Delta F/F$  according to:

$$\Delta F/F = \frac{\int_{-1/v}^0 \frac{F_{AP}}{F_0} e^{t_0/\tau} dt}{1/v} = \tau v (1 - e^{-1/\tau v}) \frac{F_{AP}}{F_0} \quad (\text{S28})$$

## 876 5 DMD alignment procedure

- 877 1. **Components:** a DMD mounted on a 6-axis stage (x, y, z, tip, tilt, rotation), a wedge prism in a rotation mount (for  
878 example Thorlabs CRM1T), a single layer fluorescent sample, laser pointer, beam height ruler
- 879 2. **Rotate the DMD surface to 45°:** Turn on all the pixels of the DMD. Point a beam from a laser pointer horizontally onto  
880 the DMD surface, and observe the reflected beam. Rotate the DMD surface until the reflected beam is also horizontal.
- 881 3. **Rotate the wedge prism horizontally:** Point a laser beam horizontally through the wedge prism. Rotate the wedge  
882 prism until the refracted beam is also horizontal.
- 883 4. **Place a fluorescent sample:** Place a single layer fluorescent sample under the microscope objective. Axially translate  
884 the sample until it is sharply focused on the camera.

- 885 5. **Insert and focus the DMD:** Insert the wedge prism and then the DMD into the optical path. Display a checkerboard  
886 pattern on the DMD. Use the galvanometer to scan the laser focus across the DMD surface, and observe the displayed  
887 DMD pattern on the camera. Axially translate the DMD position until a thin strip of the checkerboard pattern appears  
888 focused on the camera.
- 889 6. **Align the DMD to the correct tilt angle:** Slightly adjust the tilt angle of the DMD and then axially refocus the DMD on  
890 the camera. Observe whether the in-focus strip of the checkerboard pattern widens. If so continue adjusting the DMD tilt  
891 angle in the same direction and axially refocus the DMD. Otherwise, adjust the DMD tilt angle in the opposite direction.  
892 Iterate until the entire DMD surface appears sharply in focus.
- 893 7. **Align the excitation focus:** Park the laser beam at the center of the FOV, the laser excitation focus should be visible on  
894 the camera. Axially translate the lens  $f_7$  until the laser focus appears sharpest.
- 895 8. **Align lateral position of the DMD:** Adjust the x,y position of the DMD such that it covers the intended imaging ROI  
896 on the camera. If the axial position of the DMD changes due to the adjustment, refocus the DMD surface on the camera.

## 897 References

- 898 1. James Pawley. *Handbook of biological confocal microscopy*, volume 236. Springer Science & Business Media, 2006.
- 899 2. Valentino Braitenberg and Almut Schüz. *Cortex: statistics and geometry of neuronal connectivity*. Springer Science &  
900 Business Media, 2013.
- 901 3. Helgi I Ingólfsson, Timothy S Carpenter, Harsh Bhatia, Peer-Timo Bremer, Siewert J Marrink, and Felice C Lightstone.  
902 Computational lipidomics of the neuronal plasma membrane. *Biophysical Journal*, 113(10):2271–2280, 2017.
- 903 4. Alexander Song, Jeff L Gauthier, Jonathan W Pillow, David W Tank, and Adam S Charles. Neural anatomy and optical  
904 microscopy (NAOMi) simulation for evaluating calcium imaging methods. *Journal of Neuroscience Methods*, 358:109173,  
905 2021.
- 906 5. David R Sandison and Watt W Webb. Background rejection and signal-to-noise optimization in confocal and alternative  
907 fluorescence microscopes. *Applied Optics*, 33(4):603–615, 1994.
- 908 6. Brian A Wilt, James E Fitzgerald, and Mark J Schnitzer. Photon shot noise limits on optical detection of neuronal spikes  
909 and estimation of spike timing. *Biophysical Journal*, 104(1):51–62, 2013.
- 910 7. Sheng Xiao, Eric Lowet, Howard J Gritton, Pierre Fabris, Yangyang Wang, Jack Sherman, Rebecca A Mount, Hua-an  
911 Tseng, Heng-Ye Man, Christoph Straub, et al. Large-scale voltage imaging in behaving mice using targeted illumination.  
912 *iScience*, 24(11):103263, 2021.
- 913 8. Texas Instruments Inc. DMD Optical Efficiency for Visible Wavelengths. [https://www.ti.com/lit/an/  
914 dlpa083b/dlpa083](https://www.ti.com/lit/an/dlpa083b/dlpa083).

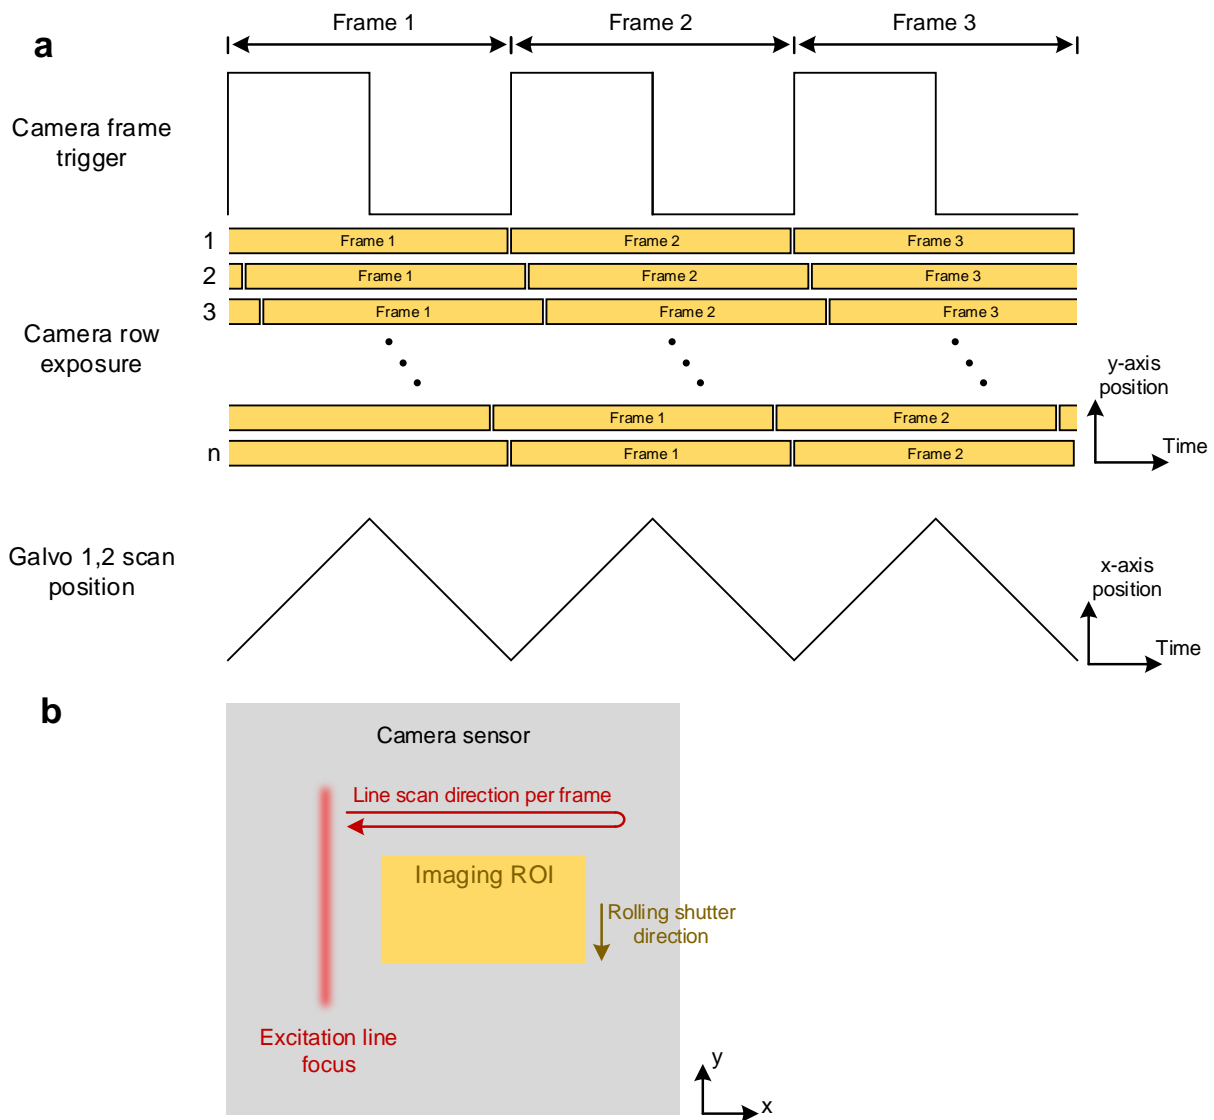

**Supplementary Fig. 9. Synchronization and image readout.**

(a) Synchronization between camera exposure time of each row (y-axis) and galvanometer scan position (x-axis).

(b) Directions of excitation line focus scanning and rolling shutter readout, and their positions relative to the actual cropped imaging ROI.

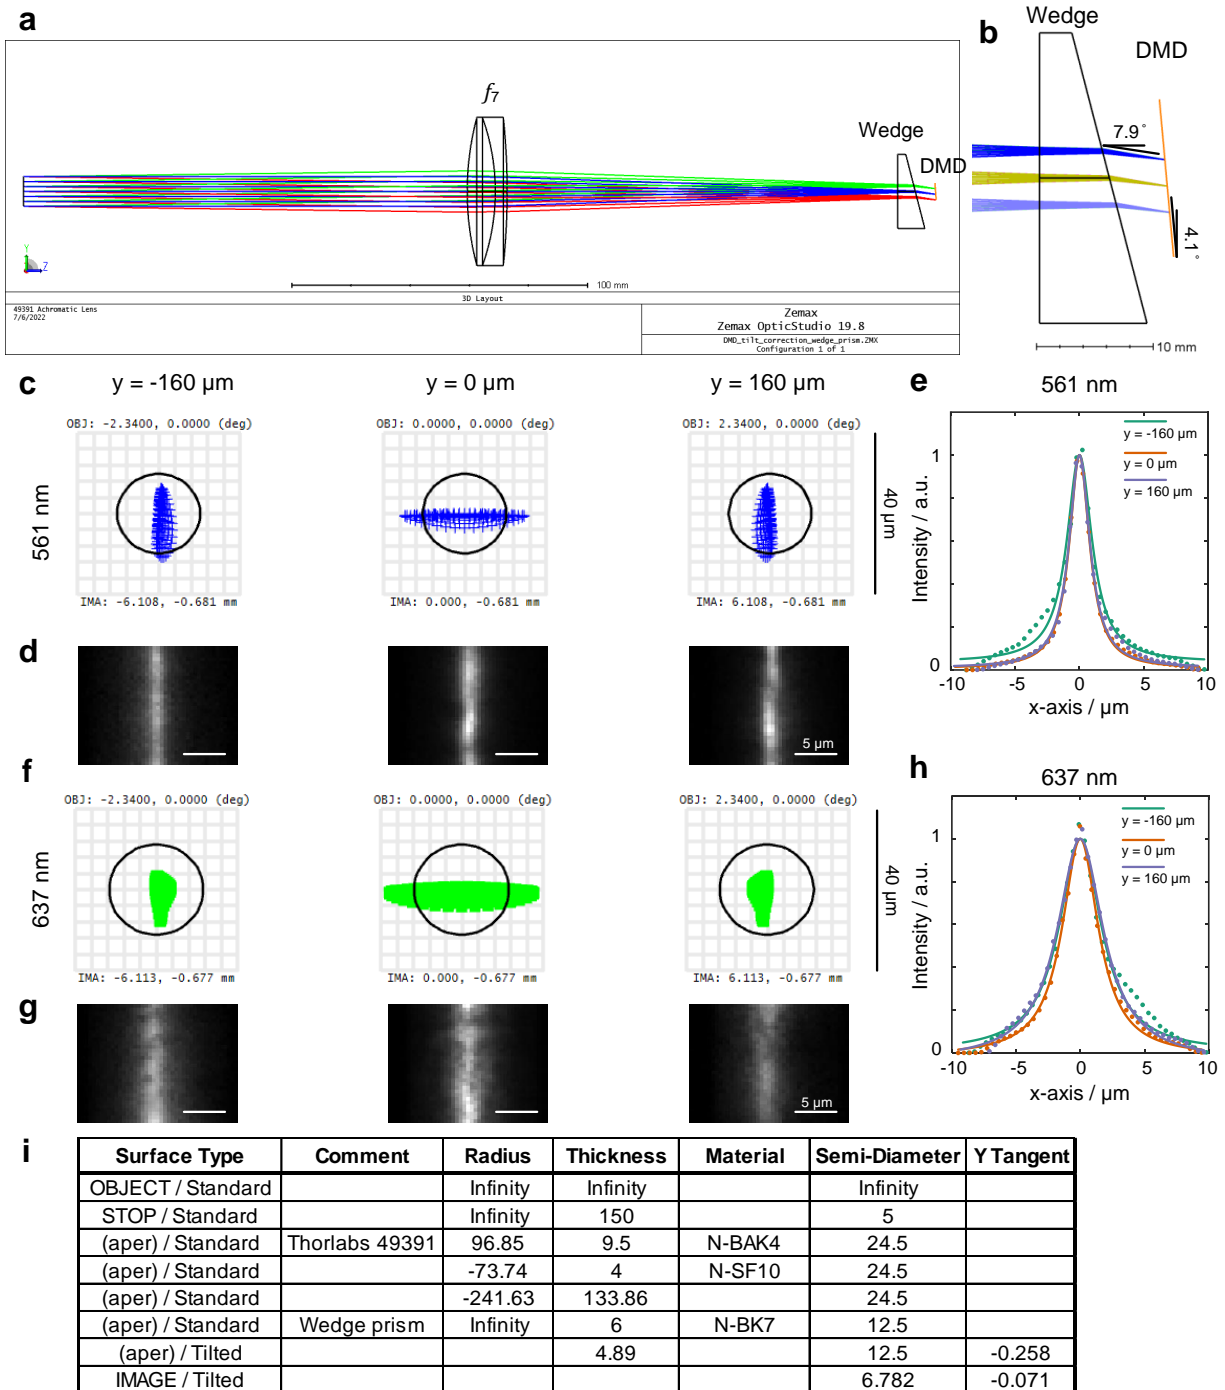

**Supplementary Fig. 10. Zemax simulation of focusing on a tilted image plane through a wedge prism.**

- (a) Zemax cross-sectional view of the system.
- (b) Zoomed-in view at the wedge prism showing matched tilt angle at the DMD surface ( $4.1^\circ + 7.9^\circ = 12^\circ$  corresponding to the micromirror tilt angle).
- (c) Zemax spot diagram for 561 nm wavelength at different vertical positions corresponding to object space locations  $y = -160, 0, 160 \mu\text{m}$ .
- (d) Image of the 561 nm laser line focus of the TICO microscope captured from the camera at object space locations  $y = -160, 0, 160 \mu\text{m}$ .
- (e) Cross-sectional intensity profiles of the line foci shown in (d). Dots, measurement points; continuous lines, Lorentzian fit.
- (f-h) Same as (c-e) but for 637 nm wavelength.
- (i) List of parameters for zemax simulation. The input aperture was set to 10 mm, corresponding to 0.4 NA in the object space. Focusing lens  $f_7 = 150 \text{ mm}$ , Thorlabs AC508-150-A. Wedge prism made of N-BK7 glass with apex angle  $14^\circ 51'$ , Edmund Optics 49-443. Image plane (DMD plane) tilted at  $4.1^\circ$ .



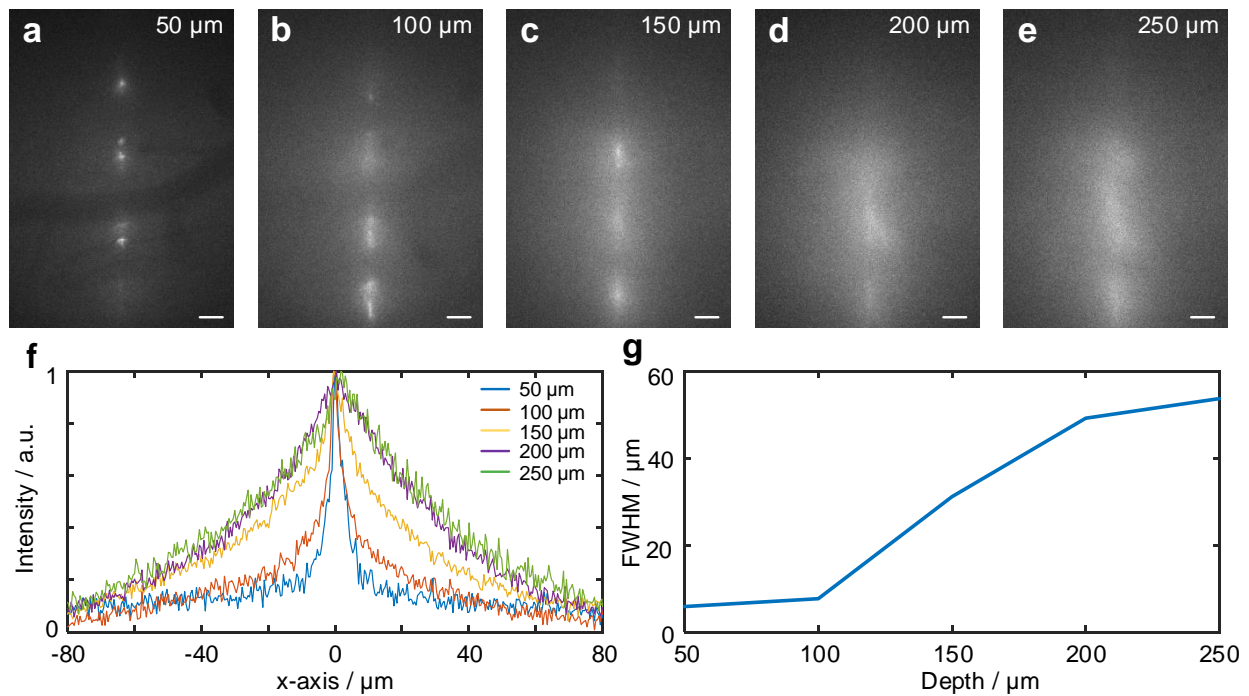

**Supplementary Fig. 11. Measurements of excitation lines under *in vivo* imaging conditions.**

(a-e) Images captured by the camera by projecting a fixed excitation line into the cortical area of an *in vivo* mouse brain. Measurements were performed using 561 nm laser and Voltron-JF552, with an open confocal slit. Imaging depths are 50, 100, 150, 200, and 250  $\mu\text{m}$  below the brain surface. Scale bars are 20  $\mu\text{m}$ .

(f) Intensity profiles of the line excitation across the sharpest features from the images in (a-e). a.u., arbitrary unit.

(g) FWHM values as a function of imaging depths measured from the intensity profiles in (f).

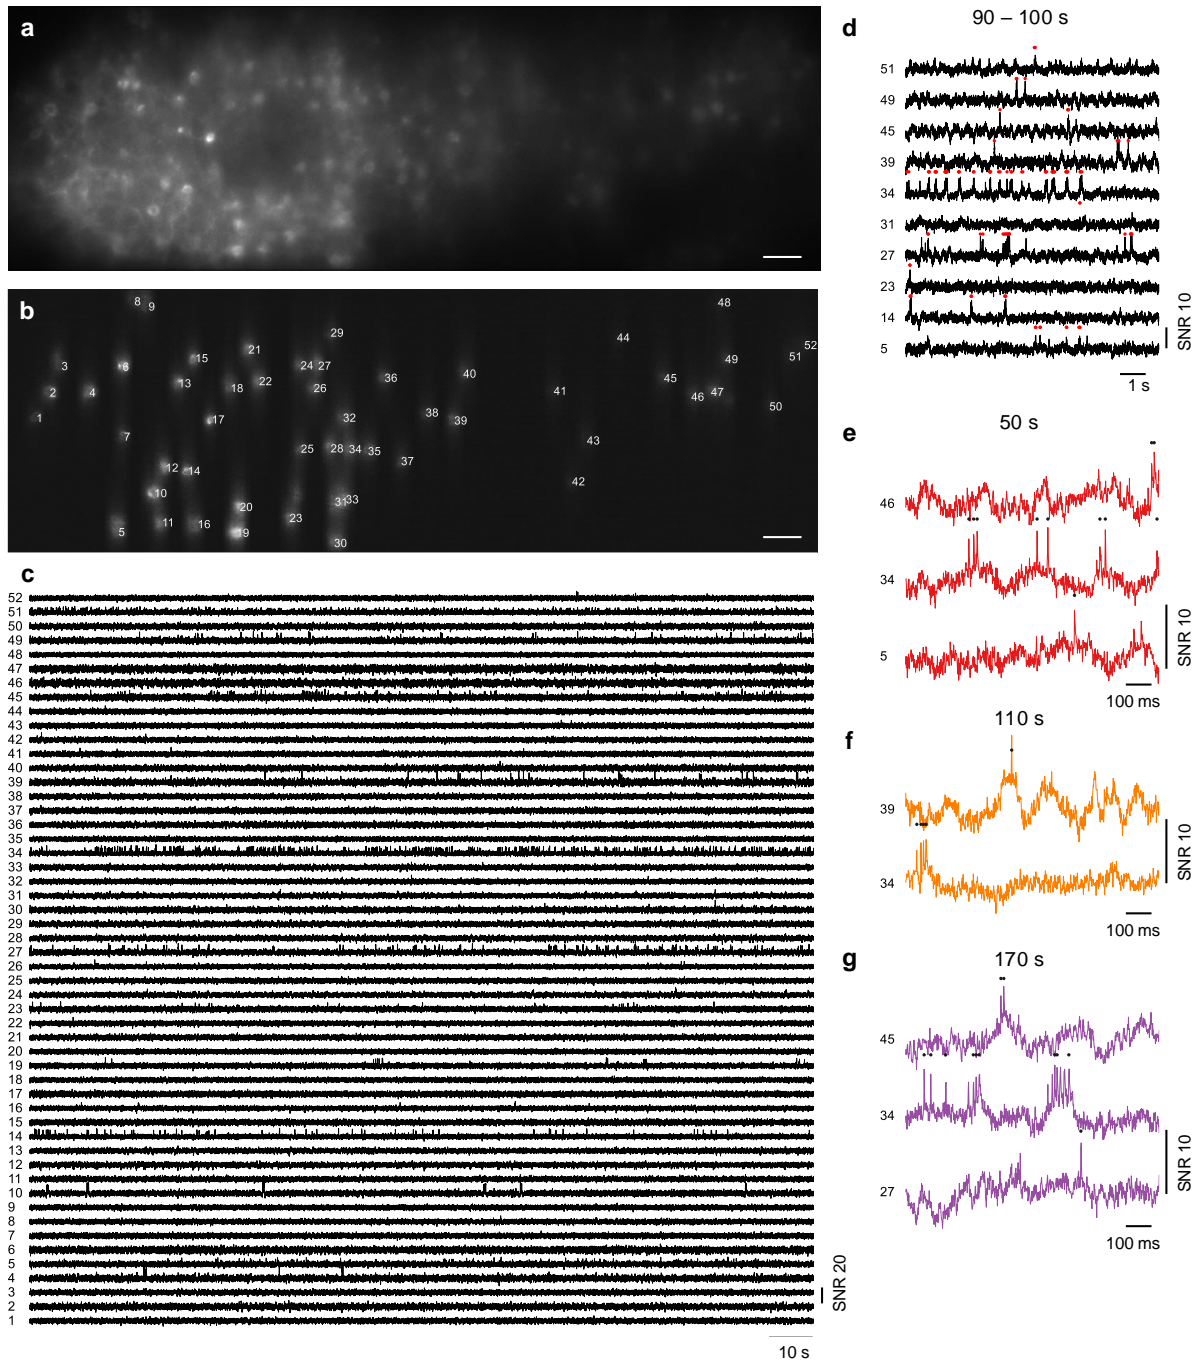

**Supplementary Fig. 12. Large-scale imaging of Voltron2 fluorescence from 52 neurons in vivo.**

- (a) Confocal image of Voltron2 fluorescence over the imaging FOV. Scale bar, 50  $\mu\text{m}$ .
- (b) Average Voltron2 fluorescence image with 52 neurons targeted within the FOV. Scale bar, 50  $\mu\text{m}$ .
- (c) Voltron2 fluorescence traces from all 52 neurons over a 3 min recording.
- (d) Zoomed-in fluorescence traces from 10 active cells during the recording period between 90 - 100 s. Dots, spike locations.
- (f-g) Further zoomed-in fluorescence traces from active cells at recording times 50 s, 110 s and 170 s.

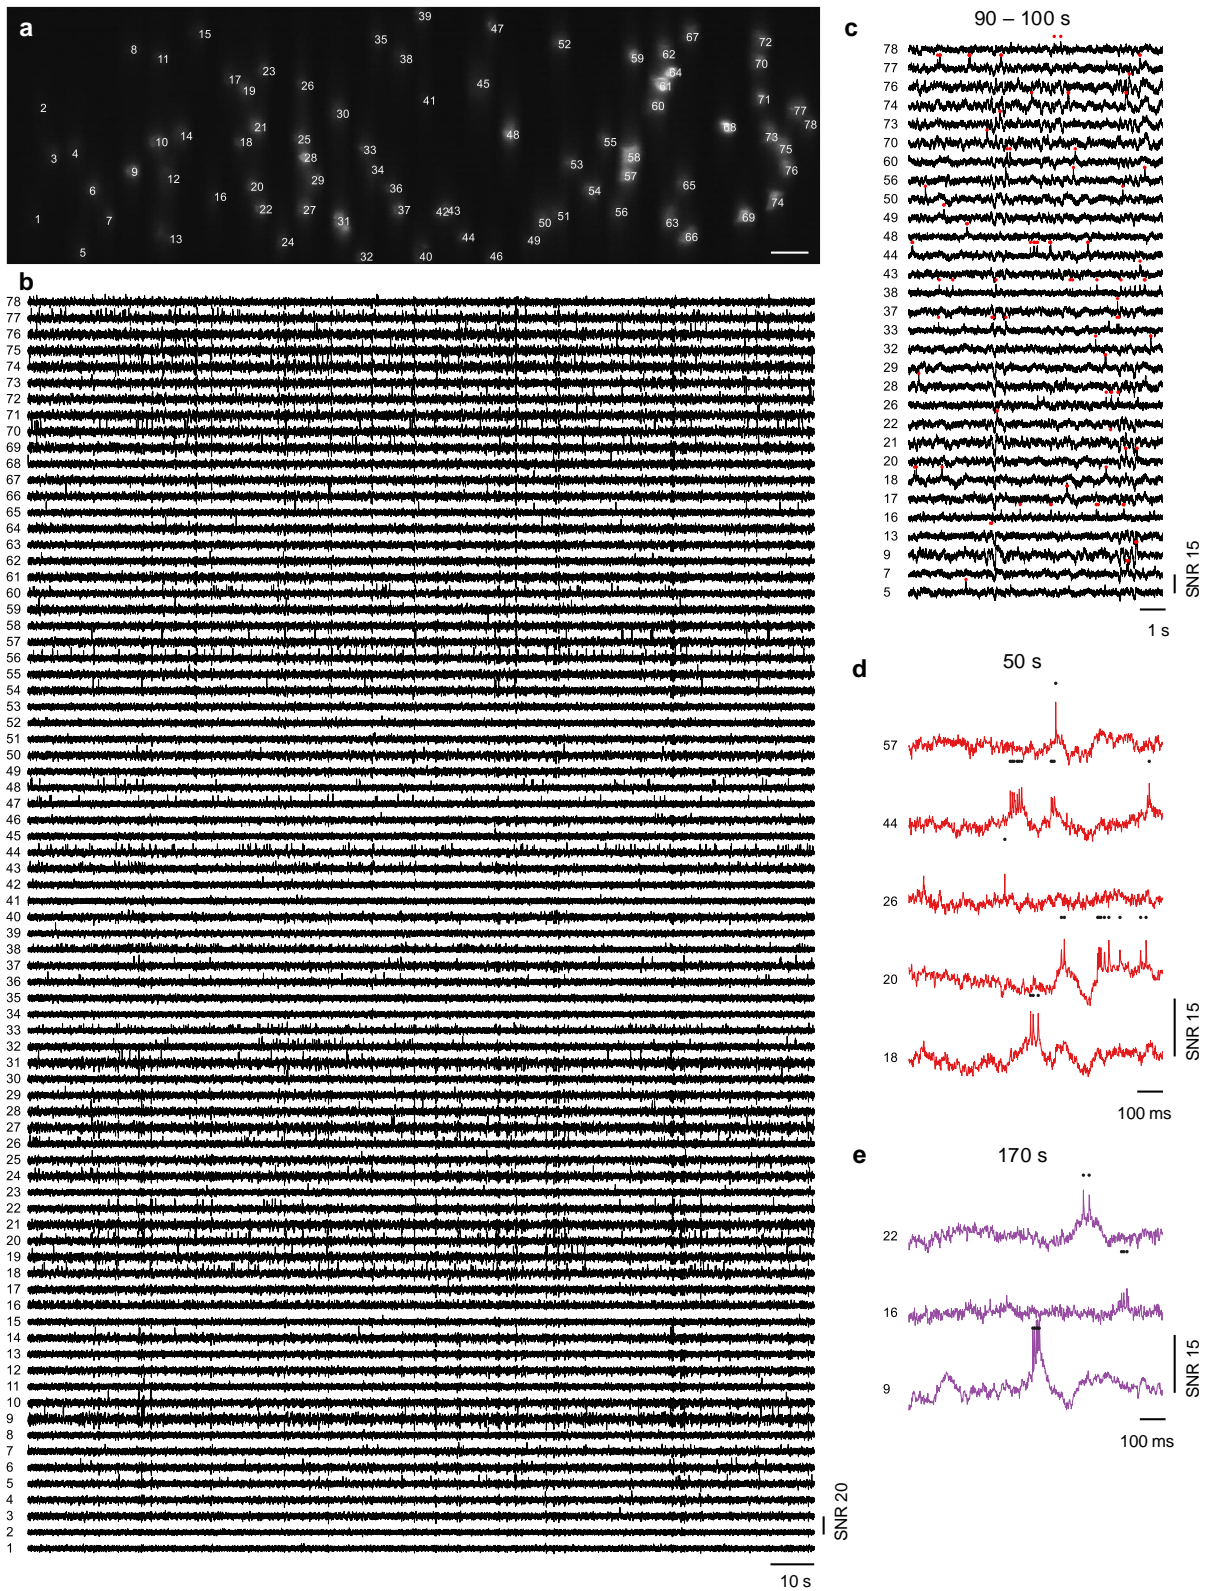

Supplementary Fig. 13. Large-scale imaging of Voltron2 fluorescence from 78 neurons in vivo.

**Supplementary Fig. 13.** (a) Average Voltron2 fluorescence image. Scale bar, 50  $\mu\text{m}$ .  
(b) Voltron2 fluorescence traces from all 78 neurons over a 3 min recording.  
(c) Zoomed-in fluorescence traces from 30 active neurons during the recording period between 90 - 100 s. Dots, spike locations.  
(d,e) Further zoomed-in fluorescence traces from active cells at recording times 50 s and 170 s.

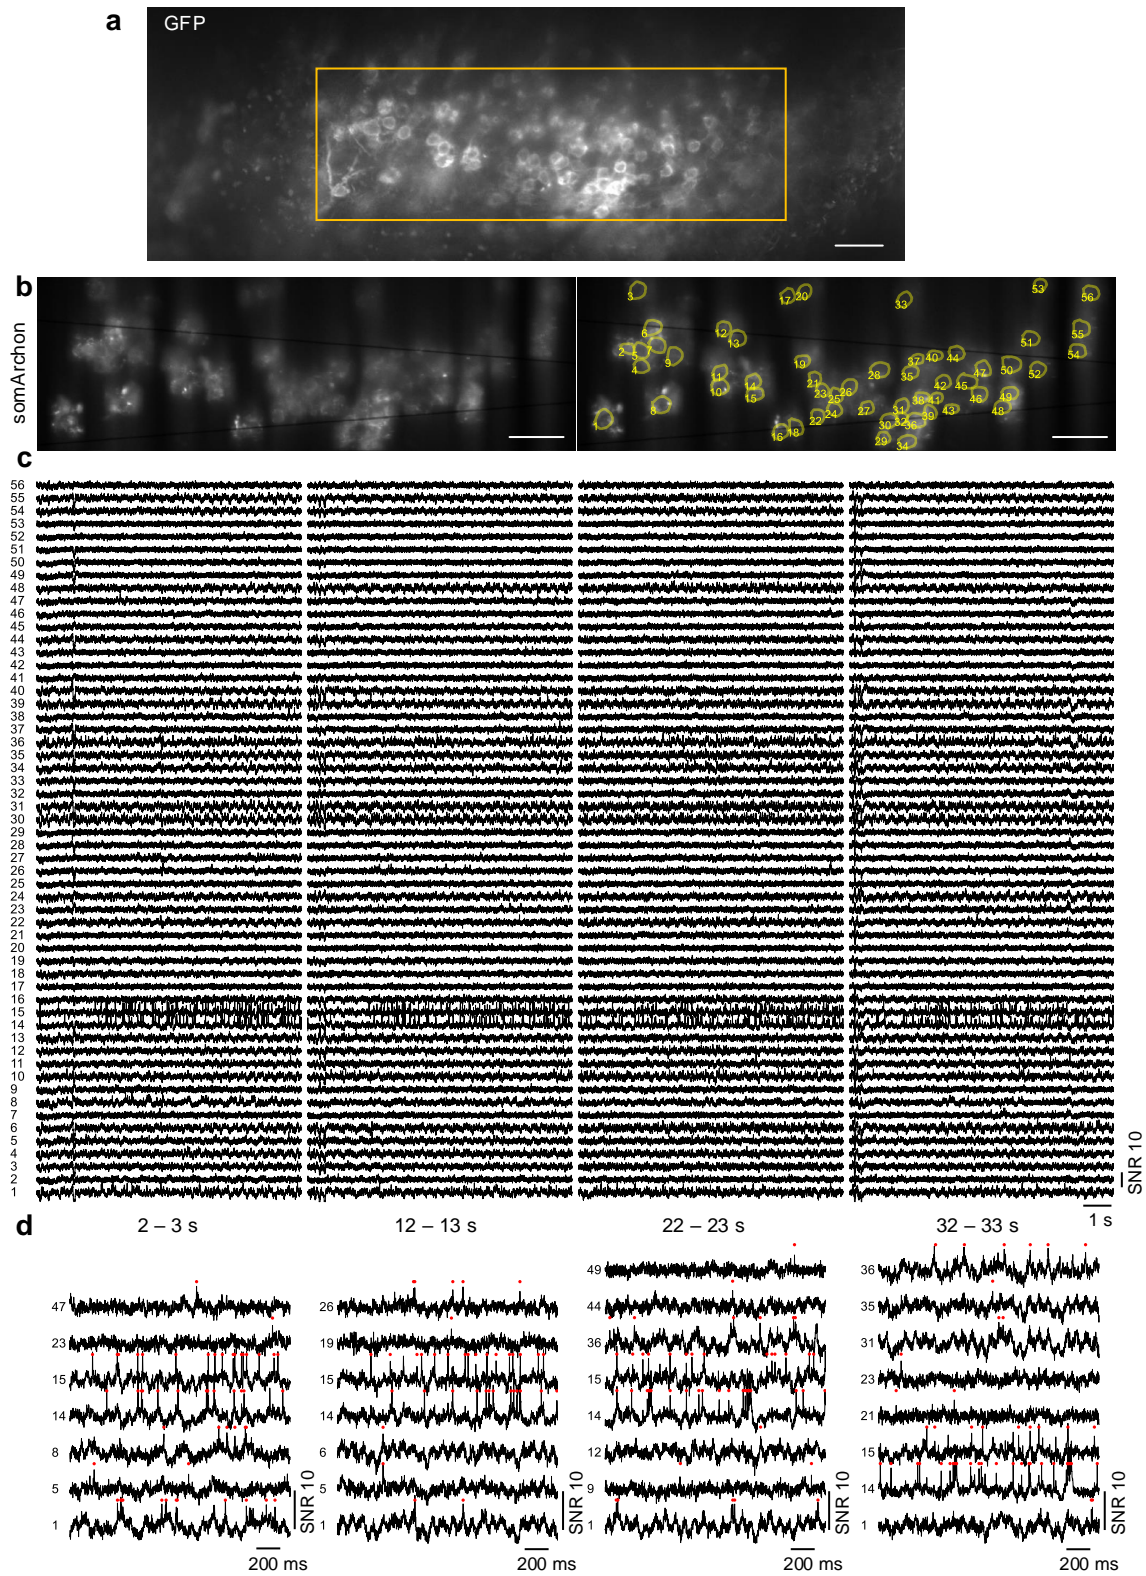

Supplementary Fig. 14. Large-scale imaging of somArchon fluorescence from 56 cells in the hippocampus.

**Supplementary Fig. 14.** (a) Confocal image of GFP fluorescence. Yellow square indicates actual somArchon imaging FOV shown in (b). Scale bar, 50  $\mu\text{m}$ .  
(b) SomArchon fluorescence image with 56 cells targeted within the FOV. Scale bar, 50  $\mu\text{m}$ .  
(c) SomArchon fluorescence traces of 56 cells over 4 separate 10 s recordings. Recording speed 800 Hz, imaging depth 80  $\mu\text{m}$ .  
(d) Zoomed-in fluorescence traces of active neurons during 2 s clips.

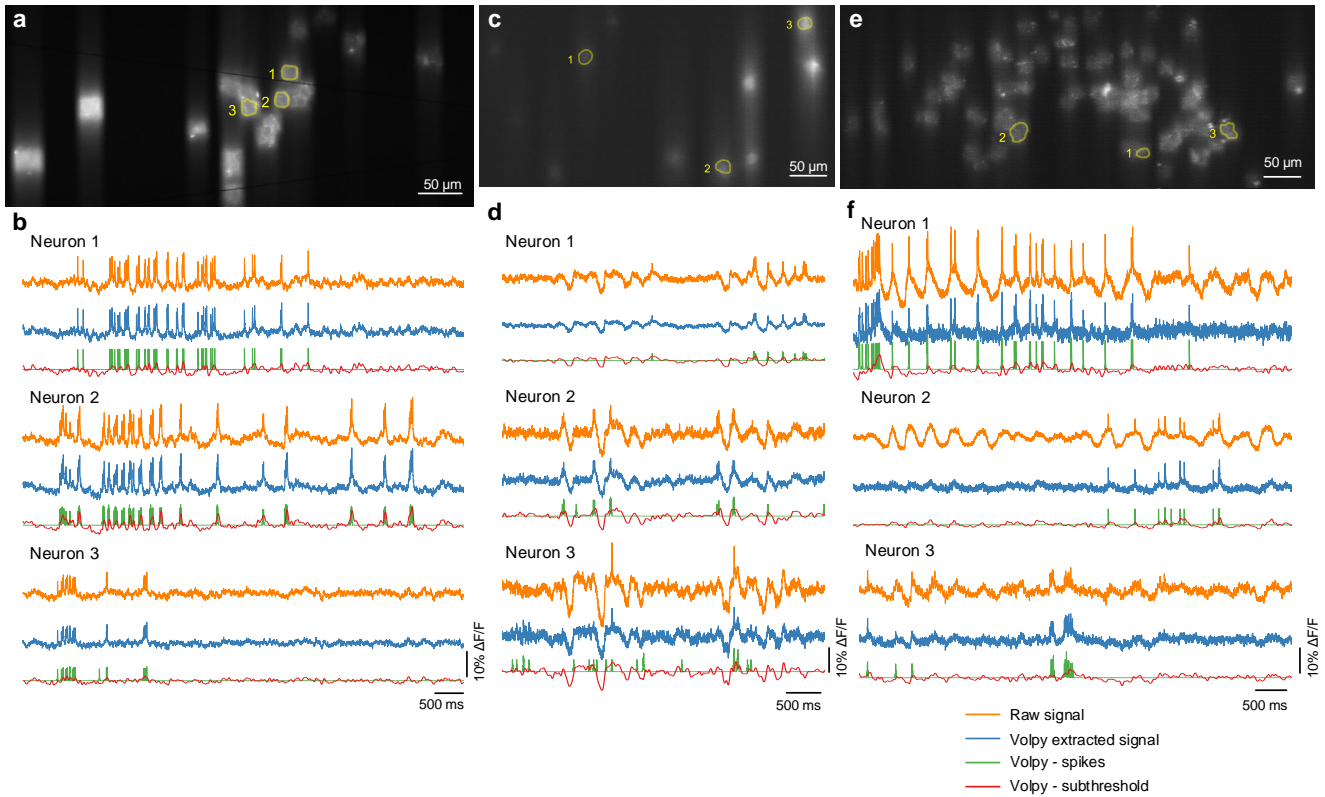

**Supplementary Fig. 15. Automatic voltage signal extraction using VolPy algorithm.** (a,c,e) Averaged fluorescence images from the datasets shown in Fig. 1(f), Extended Data Fig. 9c, and [Supplementary Fig. 16](#) respectively. Scale bars are 50  $\mu\text{m}$ .

(b,d,f) Corresponding fluorescence traces from the labeled neurons in (a,c,e) respectively. Orange trace, raw fluorescence traces obtained by integrating all pixels within the neuron ROI (high-passed at 1 Hz); blue trace, background-removed fluorescence traces extracted by VolPy; green trace, spike signals reconstructed by VolPy; red trace, subthreshold activity extracted by VolPy. The algorithm is able to extract both fast spiking activity (a,b), and subthreshold dynamics from sparsely distributed, isolated neurons (c,d). However, for densely labeled neuronal populations with correlated subthreshold activities [[Extended Data Fig. 7](#), [Supplementary Fig. 16](#)], much of the subthreshold information was removed by the algorithm [blue trace in (e,f)].

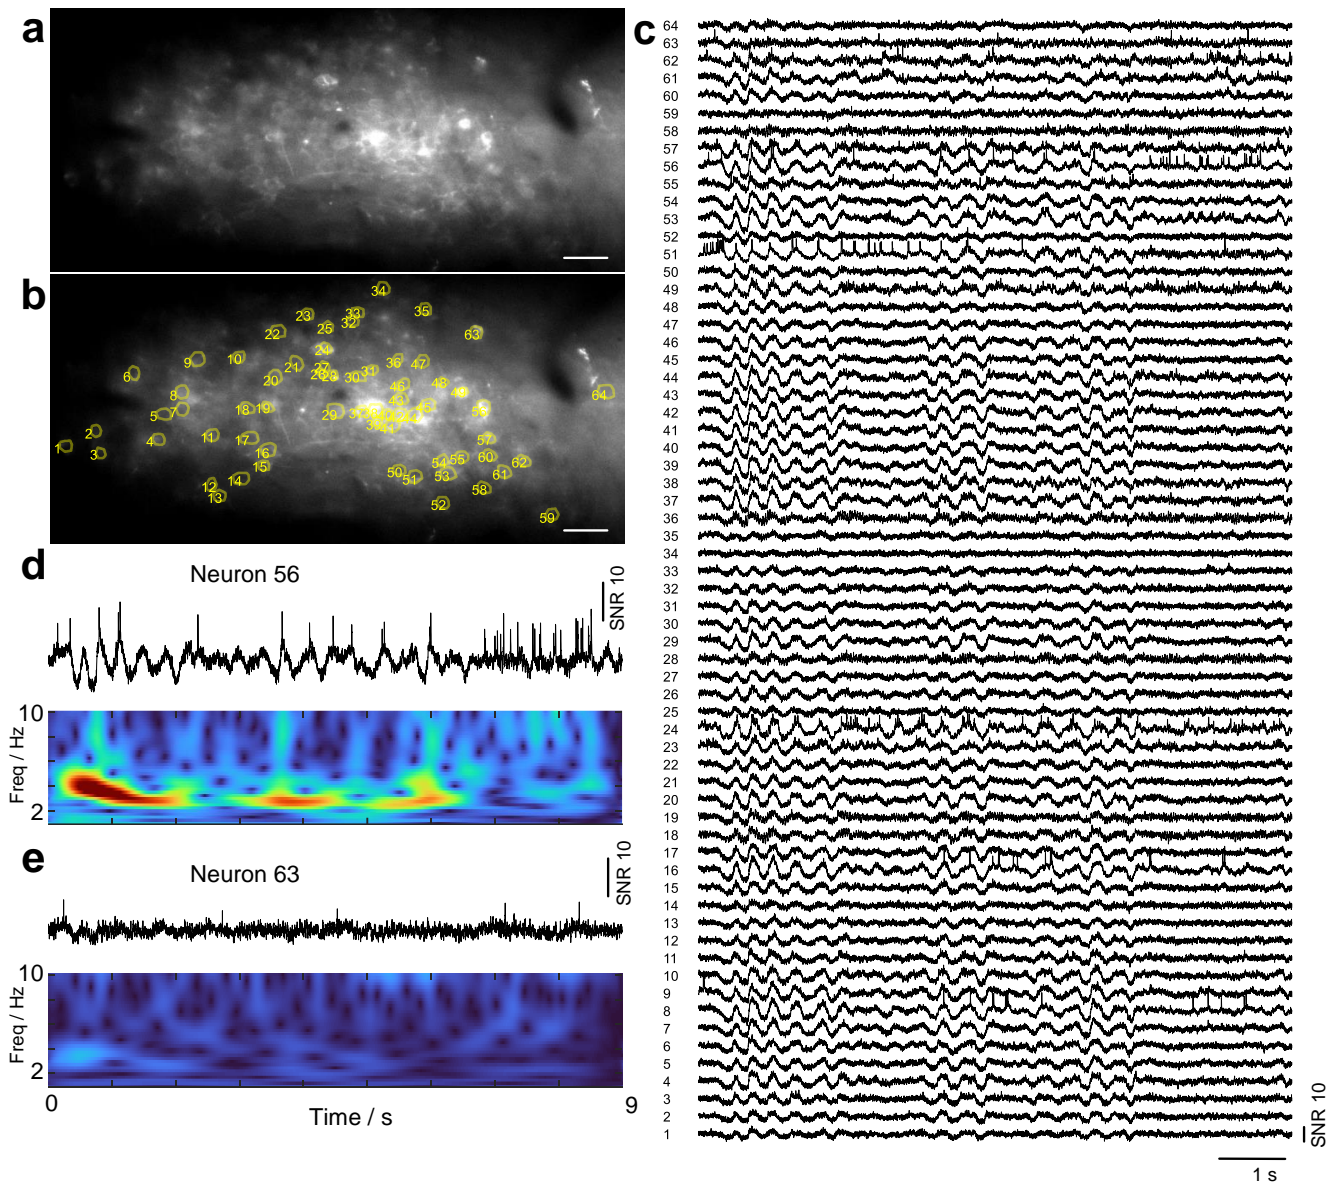

**Supplementary Fig. 16. Observation of highly synchronized 3 - 5 Hz membrane oscillations in L1 interneurons.**  
 (a) Confocal image of GFP fluorescence over the imaging FOV. Scale bar, 50  $\mu\text{m}$ .  
 (b) Same as (a) but with individual neuron ROIs outlined in yellow. Scale bar, 50  $\mu\text{m}$ .  
 (c) SomArchon fluorescence traces for all the neurons labeled in (a).  
 (d,e) Zoomed-in fluorescence traces (top panel) of two selective neurons and their corresponding power spectra (bottom panel).



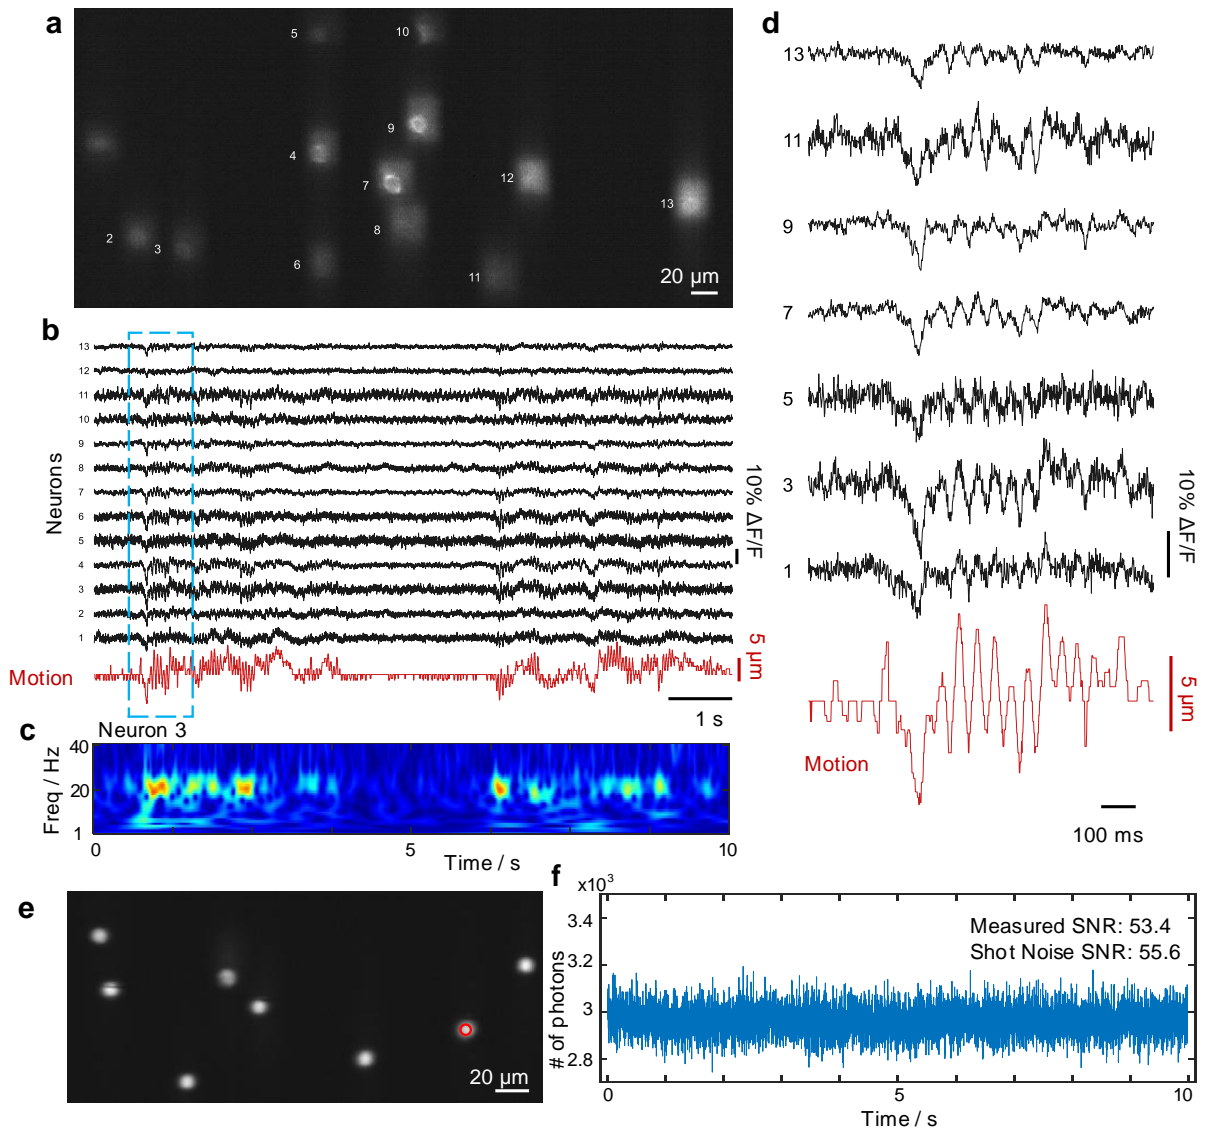

**Supplementary Fig. 17. Characterization of motion and system noise.**

- (a) Confocal image of GFP fluorescence with 12 neurons targeted within the FOV. Scale bar, 20  $\mu\text{m}$ .
- (b) Black traces: GFP fluorescence signals (high-passed at 1 Hz) from 13 neurons over a 10 s recording at 800 Hz. Red trace: animal motion measured using masked Fourier transform cross-correlation algorithm.
- (c) Power spectrum of neuron 3.
- (d) Zoomed-in fluorescence traces and animal motion over the dashed region in (b).
- (e) Confocal image of static fluorescent beads targeted within the FOV. Scale bar, 20  $\mu\text{m}$ .
- (f) Fluorescence trace over the red circled ROI shown in (e).

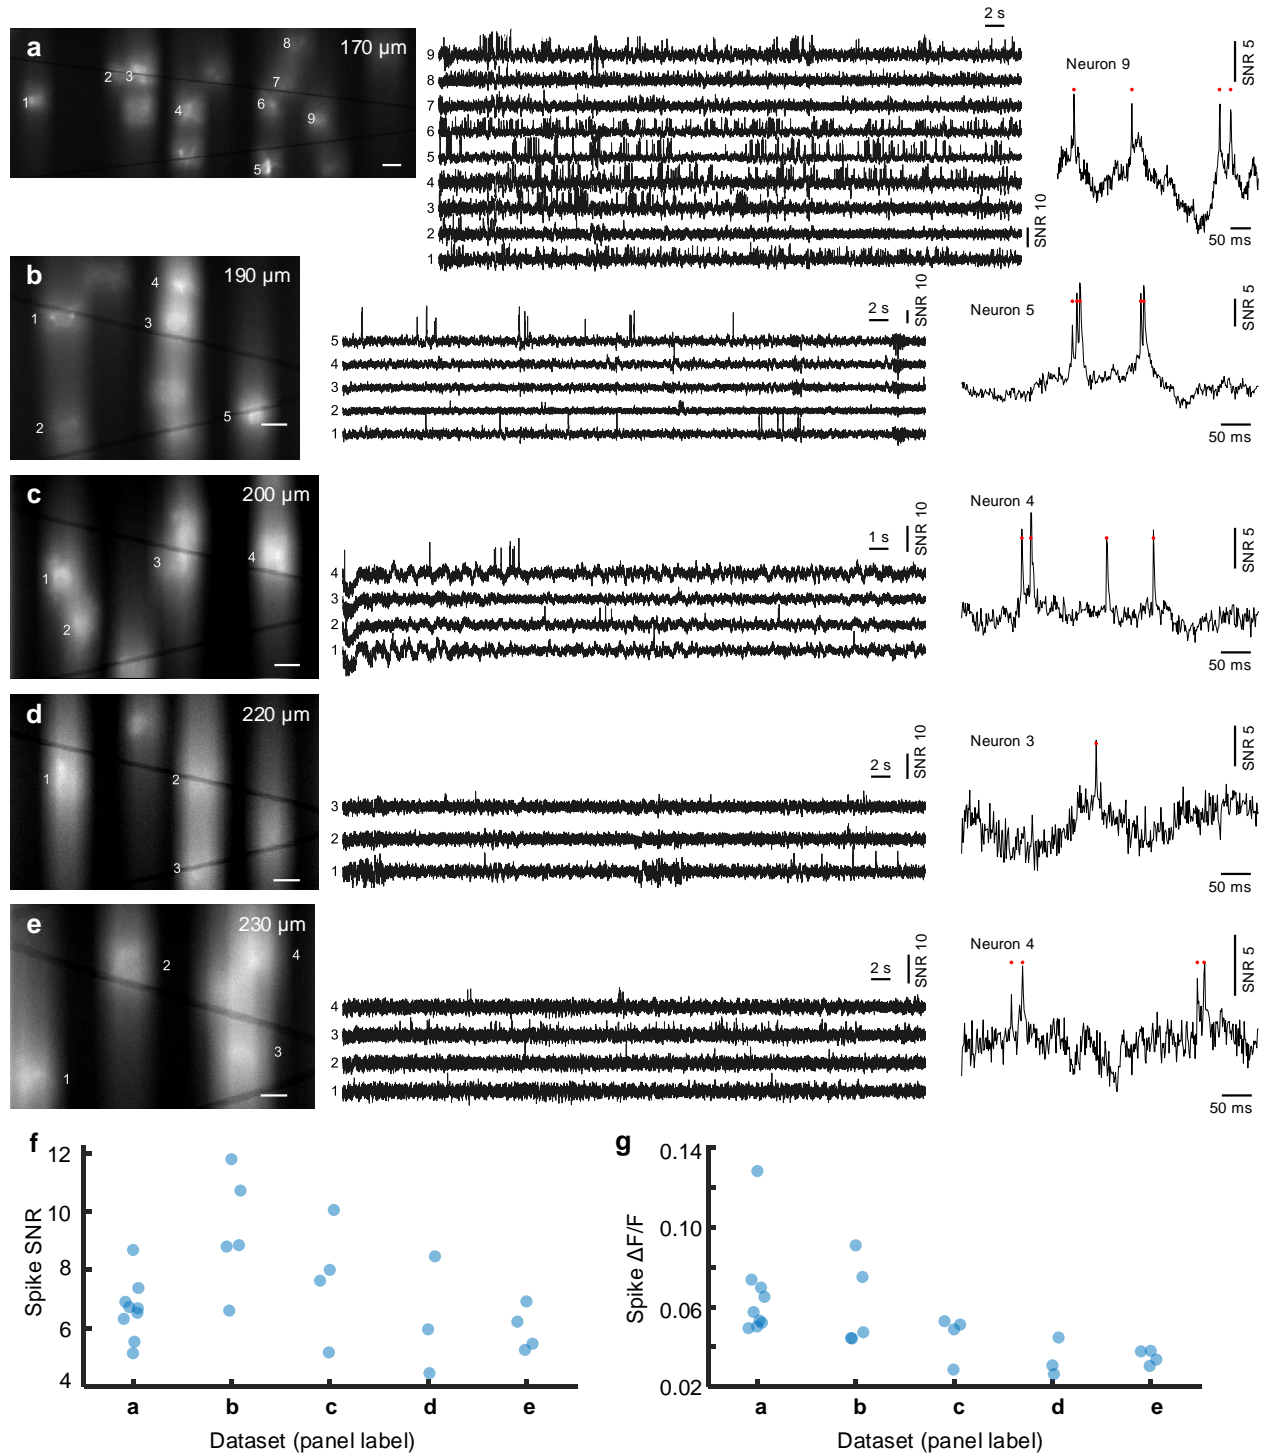

**Supplementary Fig. 18. Deep tissue voltage imaging of somArchon fluorescence.** (a-e) Left column, averaged somArchon fluorescence images acquired at depths of 170, 190, 200, 220, and 230  $\mu\text{m}$  below the brain surface. Scale bars are 20  $\mu\text{m}$ . Middle column, somArchon fluorescence traces from corresponding labeled neurons (only active neurons are shown). Recording durations were 60 s for (a,b,d,e), and 30 s for (c). Right column, spiking activities from selected neurons during 0.5 s clips. (f,g) Characterization of spike SNR and  $\Delta F/F$  from the active neurons in (a-e).

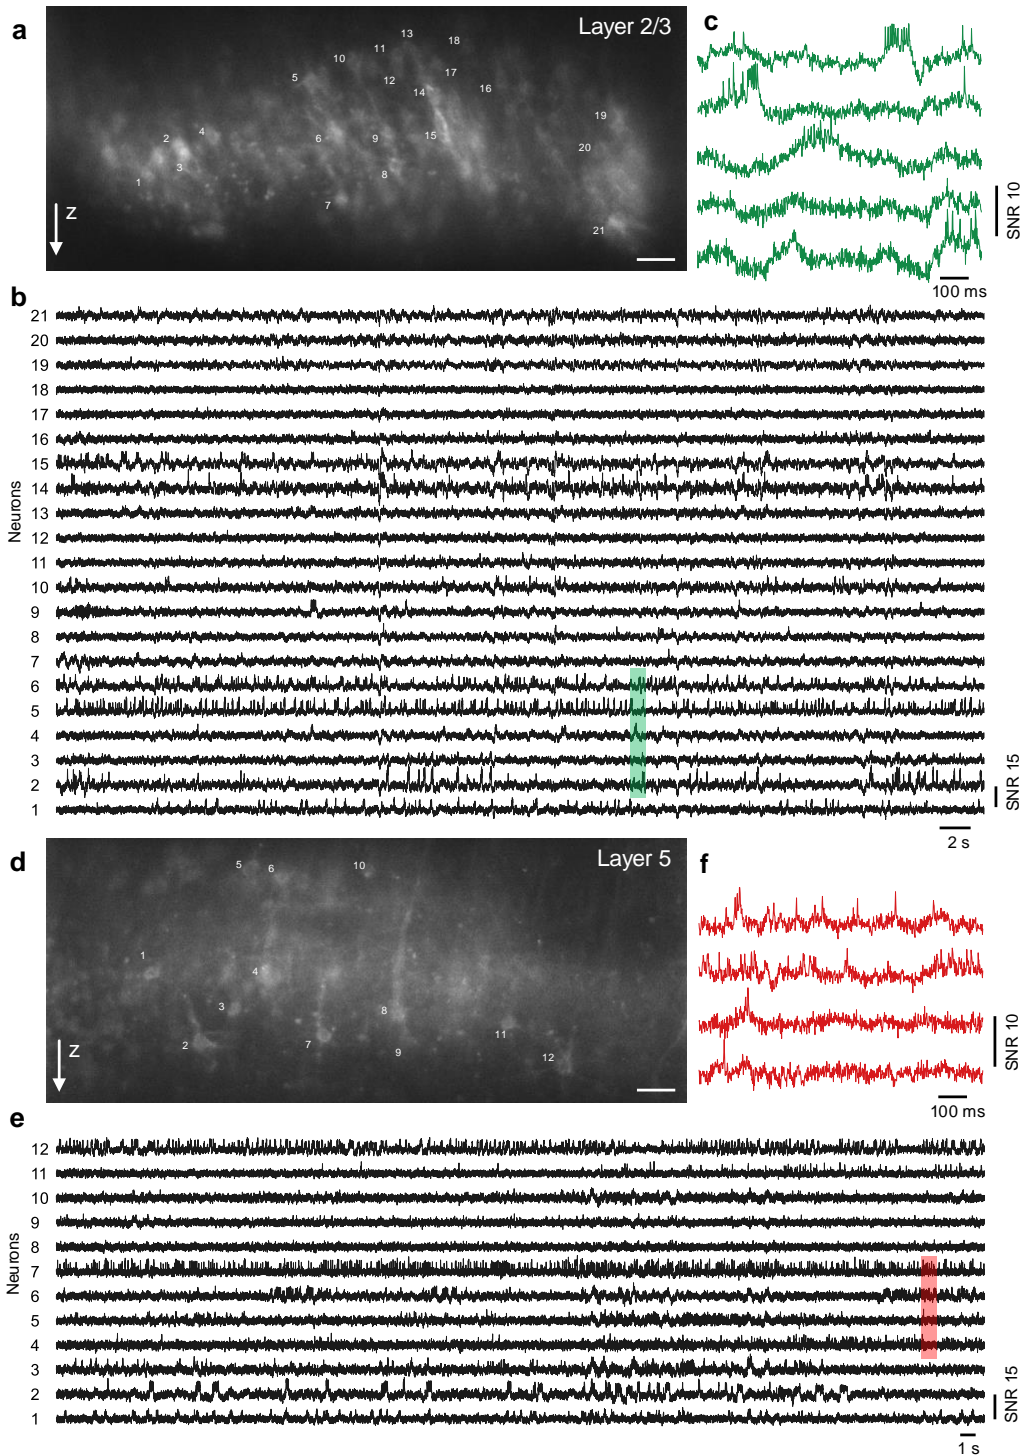

**Supplementary Fig. 19. Deep cortical voltage imaging via an implanted microprism.**

(a) Confocal image of Voltron2 fluorescence imaged via an implanted microprism over cortical layer 2/3. Scale bar, 50  $\mu\text{m}$ .

(b) Voltron2 fluorescence traces of the 21 targeted neurons over a continuous 60 s recording. Recording speed 800 Hz.

(c) Zoomed-in fluorescence traces over the shaded area in (b).

(d-e) Same as (a-c) but imaged over cortical layer 5.

**Supplementary Table 2.** Full list of components used in TICO microscope.

| Component             | Description                                                | Manufacturer            | Part number            |
|-----------------------|------------------------------------------------------------|-------------------------|------------------------|
| $f_1, f_4$            | 37.5 mm focal length Plossl eyepiece                       | Thorlabs                | 2× AC254-075-A         |
| $f_2, f_3, f_9$       | 100 mm focal length achromatic doublet                     | Thorlabs                | AC254-100-A            |
| $f_5, f_6$            | 180 mm focal length achromatic doublet                     | Thorlabs                | AC508-180-AB           |
| $f_7, f_8$            | 150 mm focal length achromatic doublet                     | Thorlabs                | AC508-150-A            |
| $Cyl_1, Cyl_7$        | -50 mm focal length cylindrical lens                       | Thorlabs                | LK1336RM-A             |
| $Cyl_2, Cyl_3, Cyl_8$ | 150 mm focal length cylindrical lens                       | Thorlabs                | LJ1629RM-A             |
| $Cyl_4, Cyl_5$        | 100 mm focal length cylindrical lens                       | Thorlabs                | LJ1567RM-A             |
| $Cyl_6$               | 75 mm focal length cylindrical lens                        | Thorlabs                | LJ1703RM-A             |
| Wedge prism           | N-BK7 14°51' apex angle wedge prism                        | Edmund Optics           | 49-443                 |
| Powell Lens           | Powell lens                                                | Laserline Optics Canada | LOCP-8.9R10-1.0        |
| PBS                   | Polarizing beamsplitter                                    | Thorlabs                | WPBS254-VIS            |
| $\lambda_1/2$         | 488 nm zero-order half-wave plate                          | Thorlabs                | WPHSM05-488            |
| $\lambda_2/2$         | 561 nm zero-order half-wave plate                          | Thorlabs                | WPH10M-561             |
| $\lambda_3/2$         | 633 nm zero-order half-wave plate                          | Thorlabs                | WPH10M-633             |
| $\lambda/4$           | 350 - 850 nm achromatic quarter-wave plate                 | Thorlabs                | AQWP10M-580            |
| Ex                    | Quadband excitation filter                                 | Chroma Technology       | ZET405/488/561/640xv2  |
| Em1, Em2              | Quadband emission filter                                   | Chroma Technology       | ZET405/488/561/640mv2  |
| DM1,2,3               | Quadband dichromatic mirror                                | Chroma Technology       | ZT405/488/561/640rpcv2 |
| DM4                   | 550 nm short pass dichromatic mirror                       | Thorlabs                | DMSP550R               |
| DM5                   | 605 nm long pass dichromatic mirror                        | Thorlabs                | DMLP605R               |
| Slit                  | Adjustable mechanical slit                                 | Thorlabs                | VA100                  |
| Galvo1,2              | 5 mm aperture, VIS dielectric-coated galvanometric scanner | ScannerMAX              | Saturn-5               |
| Camera                | sCMOS camera                                               | Teledyne Photometric    | Kinetix                |
| DMD                   | Digital micromirror device                                 | ViALUX GmbH             | V-7000 VIS             |
| 488 nm Laser          | 55mW 488nm diode laser                                     | Lasertack GmbH          | PD-01376               |
| 561 nm Laser          | 200mW 561nm CW DPSS Laser                                  | Oxxius                  | LCX-561L-200-CSB-PPA   |
| 637 nm Laser          | 6W 637 nm diode laser bar                                  | Ushio America, Inc.     | Red-HP-63x             |

**Supplementary Table 3.** List of experimental parameters.

| Dataset                      | GEVI      | Imaging distance*          | Frame rate | Imaging FOV                      | Camera ROI#       | Camera mode | Excitation intensity      | Line density          | Excitation dwell time |
|------------------------------|-----------|----------------------------|------------|----------------------------------|-------------------|-------------|---------------------------|-----------------------|-----------------------|
| Fig. 1(h,i)                  | somArchon | 100 $\mu\text{m}$          | 500 Hz     | 233 $\times$ 540 $\mu\text{m}$   | 515 $\times$ 1197 | Sensitivity | 2 W/mm <sup>2</sup>       | 0.13 / $\mu\text{m}$  | 18 $\mu\text{s}$      |
| Fig. 1(j,k)                  | Voltron2  | 150 $\mu\text{m}$          | 800 Hz     | 139 $\times$ 254 $\mu\text{m}$   | 310 $\times$ 564  | Speed       | 80 mW/mm <sup>2</sup>     | 0.033 / $\mu\text{m}$ | 43 $\mu\text{s}$      |
| Fig. 3, Extended Data Fig. 5 | Voltron2  | 160 $\pm$ 20 $\mu\text{m}$ | 800 Hz     | 332 $\times$ 1115 $\mu\text{m}$  | 735 $\times$ 2469 | Speed       | 40 mW/mm <sup>2</sup>     | 0.029 / $\mu\text{m}$ | 37 $\mu\text{s}$      |
| Fig. 4(a-c)                  | Voltron2  | 200 $\mu\text{m}$          | 800 Hz     | 339 $\times$ 813 $\mu\text{m}$   | 751 $\times$ 1803 | Speed       | 80 mW/mm <sup>2</sup>     | 0.021 / $\mu\text{m}$ | 68 $\mu\text{s}$      |
| Fig. 4(d-f)                  | Voltron2  | 250 $\mu\text{m}$          | 800 Hz     | 341 $\times$ 534 $\mu\text{m}$   | 757 $\times$ 1191 | Speed       | 120 mW/mm <sup>2</sup>    | 0.018 / $\mu\text{m}$ | 118 $\mu\text{s}$     |
| Fig. 4(g-i)                  | Voltron2  | 300 $\mu\text{m}$          | 730 Hz     | 172 $\times$ 425 $\mu\text{m}$   | 382 $\times$ 943  | Sensitivity | 120 mW/mm <sup>2</sup>    | 0.016 / $\mu\text{m}$ | 146 $\mu\text{s}$     |
| Fig. 5(c)                    | Voltron2  | 80 $\mu\text{m}$           | 800 Hz     | 159 $\times$ 616.2 $\mu\text{m}$ | 353 $\times$ 1365 | Sensitivity | 80 mW/mm <sup>2</sup>     | 0.18 / $\mu\text{m}$  | 7.9 $\mu\text{s}$     |
| Supplementary Fig. 12        | Voltron2  | 160 $\pm$ 20 $\mu\text{m}$ | 800 Hz     | 345 $\times$ 1059 $\mu\text{m}$  | 765 $\times$ 2345 | Speed       | 40 mW/mm <sup>2</sup>     | 0.029 / $\mu\text{m}$ | 37 $\mu\text{s}$      |
| Supplementary Fig. 13        | Voltron2  | 150 $\pm$ 20 $\mu\text{m}$ | 800 Hz     | 344 $\times$ 1084 $\mu\text{m}$  | 762 $\times$ 2401 | Speed       | 60 mW/mm <sup>2</sup>     | 0.033 / $\mu\text{m}$ | 43 $\mu\text{s}$      |
| Supplementary Fig. 14        | somArchon | 80 $\mu\text{m}$           | 800 Hz     | 161 $\times$ 496 $\mu\text{m}$   | 356 $\times$ 1099 | Sensitivity | 3.5 W/mm <sup>2</sup>     | 0.18 / $\mu\text{m}$  | 13.8 $\mu\text{s}$    |
| Supplementary Fig. 16        | somArchon | 80-100 $\mu\text{m}$       | 800 Hz     | 354 $\times$ 850 $\mu\text{m}$   | 787 $\times$ 1889 | Speed       | 2 - 2.5 W/mm <sup>2</sup> | 0.15 / $\mu\text{m}$  | 12 $\mu\text{s}$      |
| Supplementary Fig. 18(a)     | somArchon | 170 $\mu\text{m}$          | 800 Hz     | 160 $\times$ 433 $\mu\text{m}$   | 355 $\times$ 960  | Sensitivity | 5 W/mm <sup>2</sup>       | 0.025 / $\mu\text{m}$ | 142 $\mu\text{s}$     |
| Supplementary Fig. 18(b)     | somArchon | 190 $\mu\text{m}$          | 800 Hz     | 157 $\times$ 222 $\mu\text{m}$   | 348 $\times$ 492  | Sensitivity | 8 W/mm <sup>2</sup>       | 0.022 / $\mu\text{m}$ | 258 $\mu\text{s}$     |
| Supplementary Fig. 18(c)     | somArchon | 200 $\mu\text{m}$          | 800 Hz     | 160 $\times$ 241 $\mu\text{m}$   | 355 $\times$ 535  | Sensitivity | 8 W/mm <sup>2</sup>       | 0.021 / $\mu\text{m}$ | 271 $\mu\text{s}$     |
| Supplementary Fig. 18(d)     | somArchon | 220 $\mu\text{m}$          | 800 Hz     | 148 $\times$ 234 $\mu\text{m}$   | 328 $\times$ 519  | Sensitivity | 8 W/mm <sup>2</sup>       | 0.019 / $\mu\text{m}$ | 299 $\mu\text{s}$     |
| Supplementary Fig. 18(e)     | somArchon | 230 $\mu\text{m}$          | 800 Hz     | 130 $\times$ 195 $\mu\text{m}$   | 290 $\times$ 541  | Sensitivity | 8 W/mm <sup>2</sup>       | 0.019 / $\mu\text{m}$ | 299 $\mu\text{s}$     |
| Supplementary Fig. 19(a)     | Voltron2  | 80 $\mu\text{m}$           | 800 Hz     | 275 $\times$ 675 $\mu\text{m}$   | 610 $\times$ 1499 | Speed       | 60 mW/mm <sup>2</sup>     | 0.18 / $\mu\text{m}$  | 5.9 $\mu\text{s}$     |
| Supplementary Fig. 19(d)     | Voltron2  | 80 $\mu\text{m}$           | 800 Hz     | 316 $\times$ 584 $\mu\text{m}$   | 703 $\times$ 1298 | Speed       | 60 mW/mm <sup>2</sup>     | 0.18 / $\mu\text{m}$  | 5.9 $\mu\text{s}$     |
| Extended Data Fig. 3         | Voltron2  | 150 $\mu\text{m}$          | 1000 Hz    | 329 $\times$ 740 $\mu\text{m}$   | 729 $\times$ 1641 | Speed       | 80 mW/mm <sup>2</sup>     | 0.033 / $\mu\text{m}$ | 34 $\mu\text{s}$      |
| Extended Data Fig. 4(a-e)    | Voltron2  | 130 $\mu\text{m}$          | 2000 Hz    | 260 $\times$ 336 $\mu\text{m}$   | 576 $\times$ 746  | Speed       | 130 mW/mm <sup>2</sup>    | 0.049 / $\mu\text{m}$ | 19 $\mu\text{s}$      |
| Extended Data Fig. 4(f-j)    | somArchon | 80 $\mu\text{m}$           | 4000 Hz    | 82 $\times$ 126 $\mu\text{m}$    | 181 $\times$ 279  | Speed       | 14 W/mm <sup>2</sup>      | 0.18 / $\mu\text{m}$  | 55 $\mu\text{s}$      |
| Extended Data Fig. 6         | somArchon | 100 $\mu\text{m}$          | 775 Hz     | 163 $\times$ 498 $\mu\text{m}$   | 363 $\times$ 1103 | Sensitivity | 2.5 W/mm <sup>2</sup>     | 0.13 / $\mu\text{m}$  | 14 $\mu\text{s}$      |
| Extended Data Fig. 7         | somArchon | 80-100 $\mu\text{m}$       | 800 Hz     | 226 $\times$ 636 $\mu\text{m}$   | 503 $\times$ 1413 | Speed       | 2 - 2.5 W/mm <sup>2</sup> | 0.15 / $\mu\text{m}$  | 12 $\mu\text{s}$      |
| Extended Data Fig. 9a        | Voltron2  | 220 $\mu\text{m}$          | 800 Hz     | 261 $\times$ 467 $\mu\text{m}$   | 579 $\times$ 1035 | Speed       | 80 mW/mm <sup>2</sup>     | 0.019 / $\mu\text{m}$ | 75 $\mu\text{s}$      |
| Extended Data Fig. 9b        | Voltron2  | 270 $\mu\text{m}$          | 800 Hz     | 140 $\times$ 454 $\mu\text{m}$   | 311 $\times$ 1006 | Sensitivity | 150 mW/mm <sup>2</sup>    | 0.017 / $\mu\text{m}$ | 157 $\mu\text{s}$     |
| Extended Data Fig. 9c        | Voltron2  | 300 $\mu\text{m}$          | 800 Hz     | 250 $\times$ 488 $\mu\text{m}$   | 554 $\times$ 1082 | Speed       | 130 mW/mm <sup>2</sup>    | 0.016 / $\mu\text{m}$ | 144 $\mu\text{s}$     |
| Extended Data Fig. 9d        | Voltron2  | 300 $\mu\text{m}$          | 800 Hz     | 297 $\times$ 309 $\mu\text{m}$   | 657 $\times$ 685  | Speed       | 150 mW/mm <sup>2</sup>    | 0.016 / $\mu\text{m}$ | 167 $\mu\text{s}$     |

\* Imaging distance refers to the relative distance between the focal plane and the brain surface at the distal end of the optical window.

# Camera ROI in units of pixels, row  $\times$  column. 0.45  $\mu\text{m}$  per pixel sampling. No digital binning was used. Camera ROI was typically cropped to be smaller than the maximum allowable ROI to reduce data size.
